# Supplementary material for: A Fast and Convenient Synthesis of New Water-Soluble, Polyanionic Dendrimers
Source: MDPI journal article supplement (doi:10.3390/molecules26164754), 2021-08-06

## Supplementary Material

### **A fast and convenient synthesis of new water-soluble, polyanionic dendrimers.**

Grzegorz M. Salamończyk

*Centre of Molecular and Macromolecular Studies. The Polish Academy of Sciences,  
Sienkiewicza 112, 90-363 Łódź, Poland.*

*Tel.: + 48-42-684-7113; fax: +48-42-684-7126; e-mail: gmsalamo@cbmm.lodz.pl*

### **The NMR and Mass spectra.**

|                                                   |                 |
|---------------------------------------------------|-----------------|
| Spectra of the acid <b>1</b> .....                | pages S2 – S3   |
| Spectra of the benzyl-type alcohol <b>2</b> ..... | pages S3 – S4   |
| Spectra of the dendrimer <b>4</b> .....           | pages S5 - S7   |
| Spectra of the dendrimer <b>5 (6)</b> .....       | pages S8 - S9   |
| Spectra of the dendrimer <b>7</b> .....           | pages S10 - S12 |
| Spectra of the dendrimer <b>8 (9)</b> .....       | pages S13 - S14 |
| Spectra of the dendrimer <b>10</b> .....          | pages S15 - S18 |
| Spectra of the dendrimer <b>11 (12)</b> .....     | pages S18 - S21 |
| Spectra of the dendrimer <b>14</b> .....          | pages S21 – S23 |
| Spectra of the dendrimer <b>15 (16)</b> .....     | pages S24 - S25 |
| Spectra of the dendrimer <b>17</b> .....          | pages S26 – S28 |
| Spectra of the dendrimer <b>18 (19)</b> .....     | pages S28 – S30 |
| Spectra of the dendrimer <b>21</b> .....          | pages S31 – S32 |
| Spectra of the dendrimer <b>22 (23)</b> .....     | pages S33 – S35 |

## Spectra of the acid **1**.

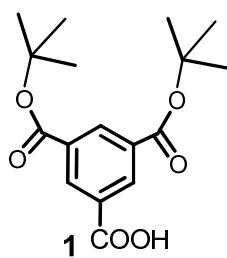

## $^1\text{H}$ NMR

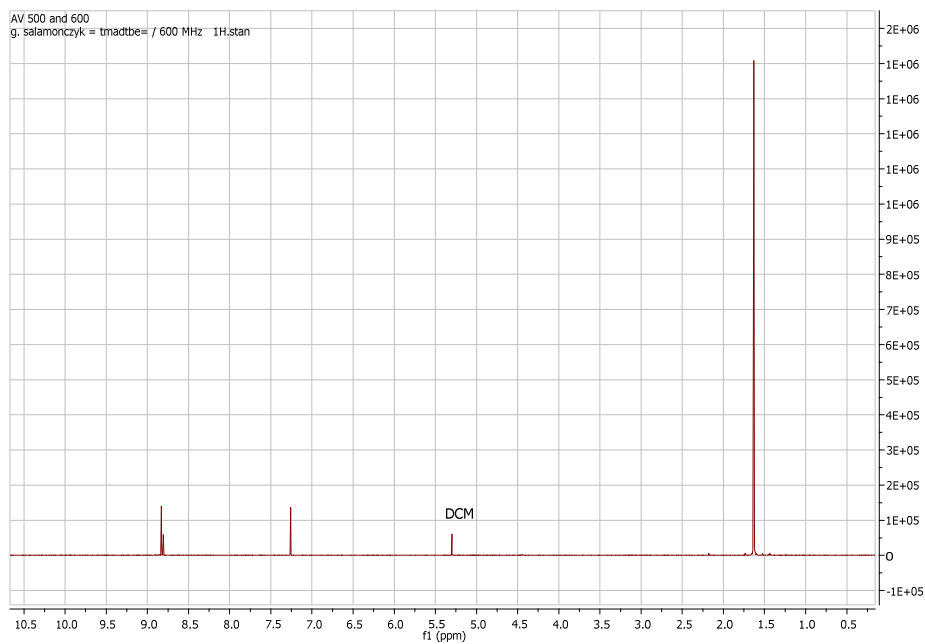

## $^{13}\text{C}$ NMR

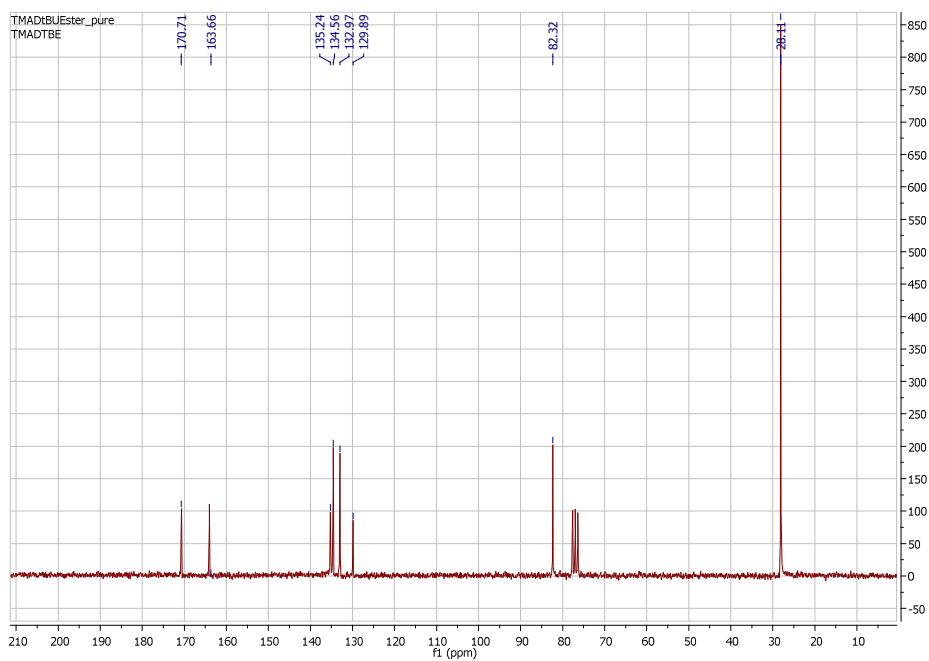

## Mass Spectrum

### Elemental Composition Report

Page 1

#### Single Mass Analysis

Tolerance = 5.0 PPM / DBE: min = -1.5, max = 70.0

Element prediction: Off

Number of isotope peaks used for i-FIT = 9

Monoisotopic Mass, Odd and Even Electron Ions

18 formula(e) evaluated with 1 results within limits (all results (up to 1000) for each mass)

Elements Used:

C: 0-30 H: 0-25 O: 0-7

Salamo

200203\_TMADTBE\_APCInA 16 (0.177) Cm (14:24-(3:11+41:72))

TOF MS AP-  
2.34e+005

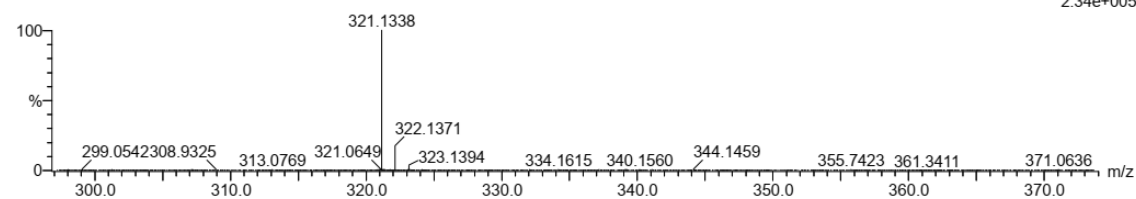

Minimum: -1.5  
Maximum: 5.0 5.0 70.0

| Mass     | Calc. Mass | mDa | PPM | DBE | i-FIT  | Norm | Conf(%) | Formula    |
|----------|------------|-----|-----|-----|--------|------|---------|------------|
| 321.1338 | 321.1338   | 0.0 | 0.0 | 7.5 | 1539.8 | n/a  | n/a     | C17 H21 O6 |

## Spectra of the benzyl-type alcohol 2

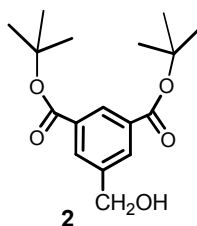

## <sup>1</sup>H NMR

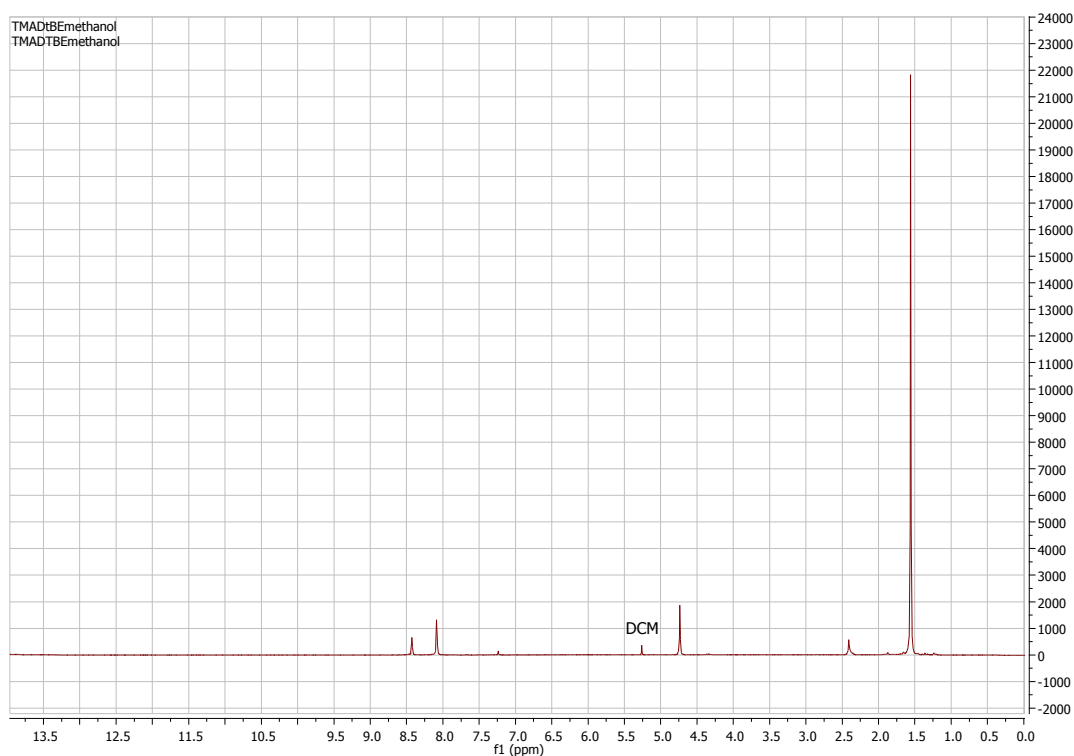

# <sup>13</sup>C NMR

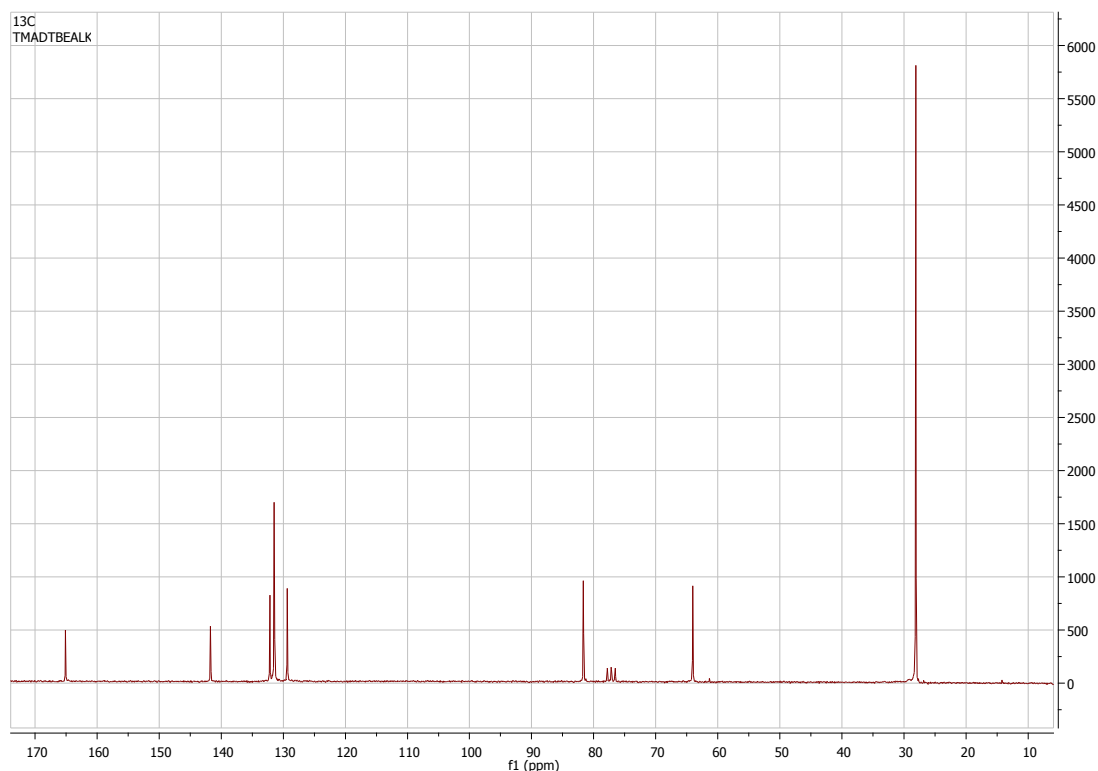

## Mass Spectrum

### Elemental Composition Report

Page 1

### Single Mass Analysis

Tolerance = 5.0 PPM / DBE: min = -1.5, max = 70.0

Element prediction: Off

Number of isotope peaks used for i-FIT = 9

Monoisotopic Mass, Odd and Even Electron Ions

18 formula(e) evaluated with 1 results within limits (all results (up to 1000) for each mass)

Elements Used:

C: 0-30 H: 0-25 O: 0-7

Salmo

200203\_TMADTBEalk\_APCInA 16 (0.177) Cm (14:20-(3:11+36:72))

TOF MS AP-  
1.31e+005

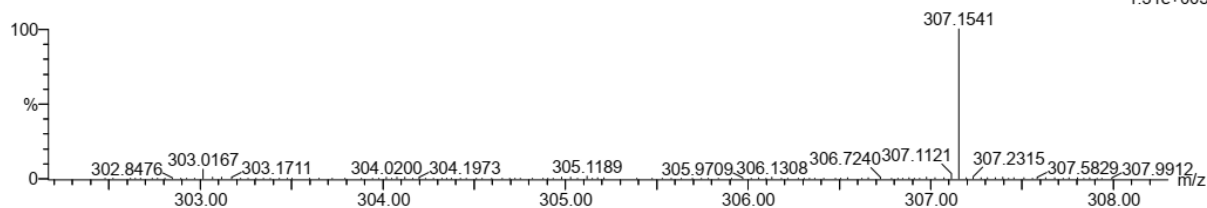

Minimum: -1.5  
Maximum: 5.0 5.0 70.0

| Mass     | Calc. Mass | mDa  | PPM  | DBE | i-FIT | Norm | Conf(%) | Formula    |
|----------|------------|------|------|-----|-------|------|---------|------------|
| 307.1541 | 307.1545   | -0.4 | -1.3 | 6.5 | 271.9 | n/a  | n/a     | C17 H23 O5 |

## Spectra of the dendrimer **4**

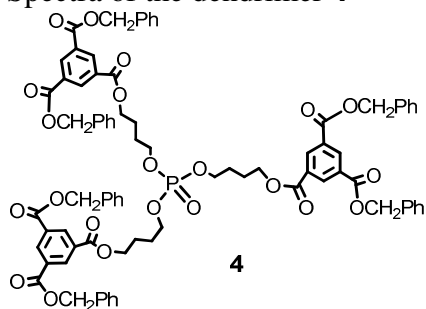

### $^1\text{H}$ NMR

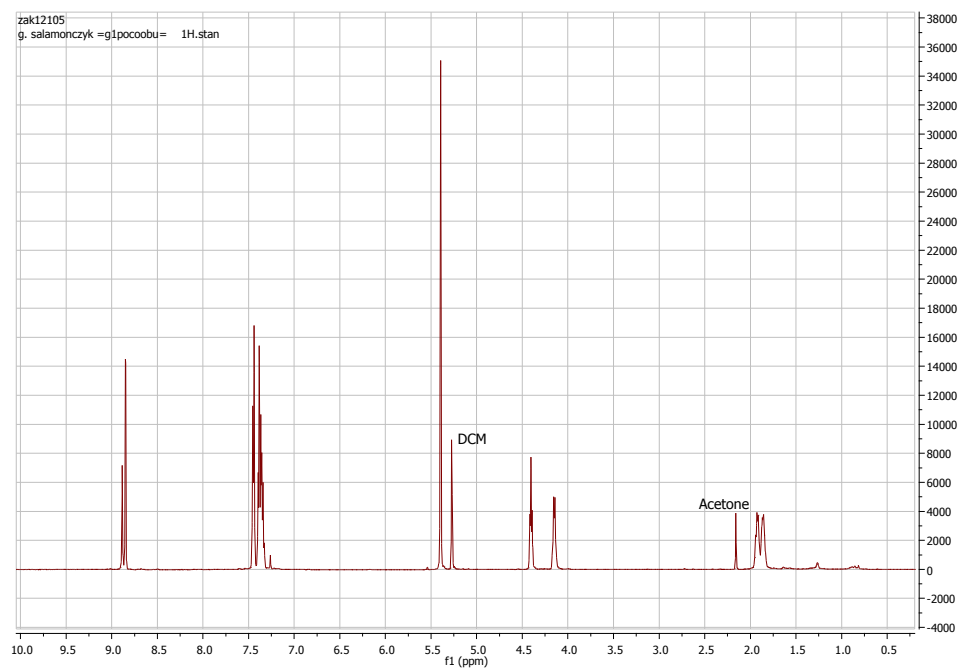

### $^{13}\text{C}$ NMR

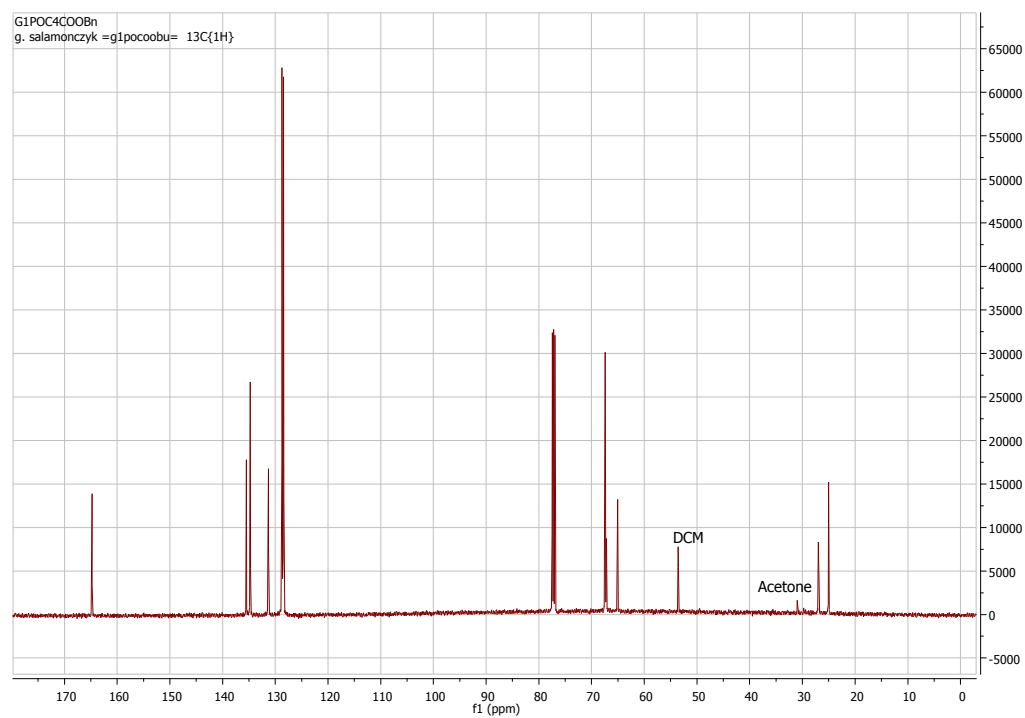

# $^{13}\text{C}\{^{31}\text{P}\}$ NMR

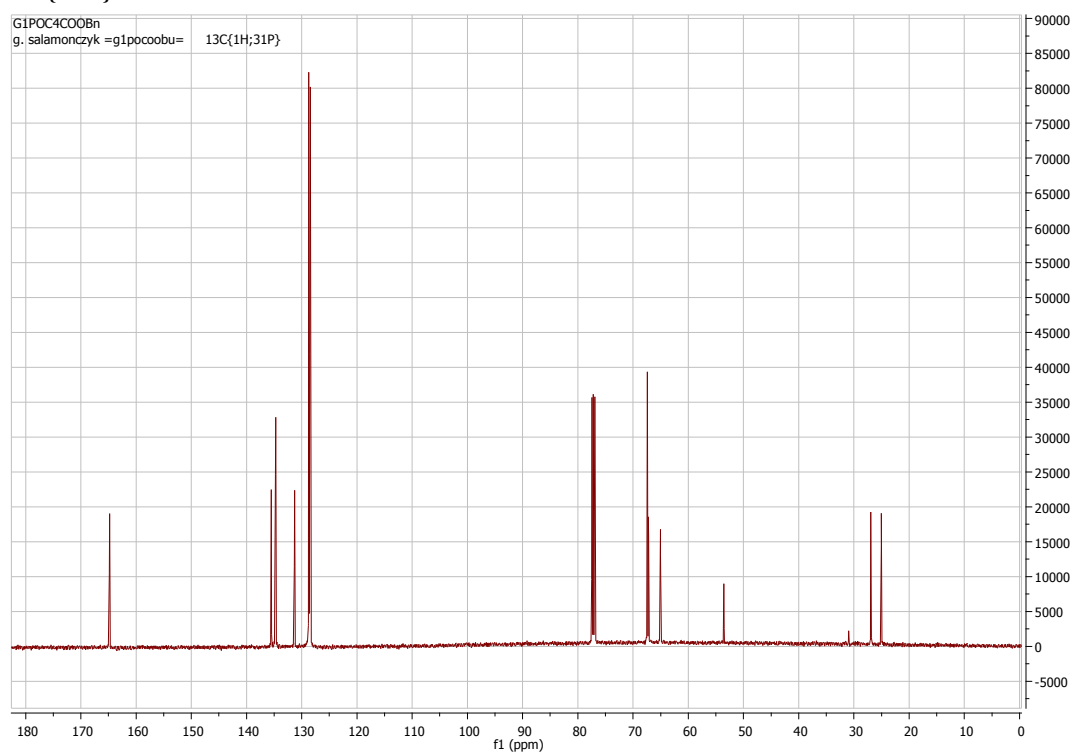

# $^{13}\text{C}$ DEPT-135 NMR

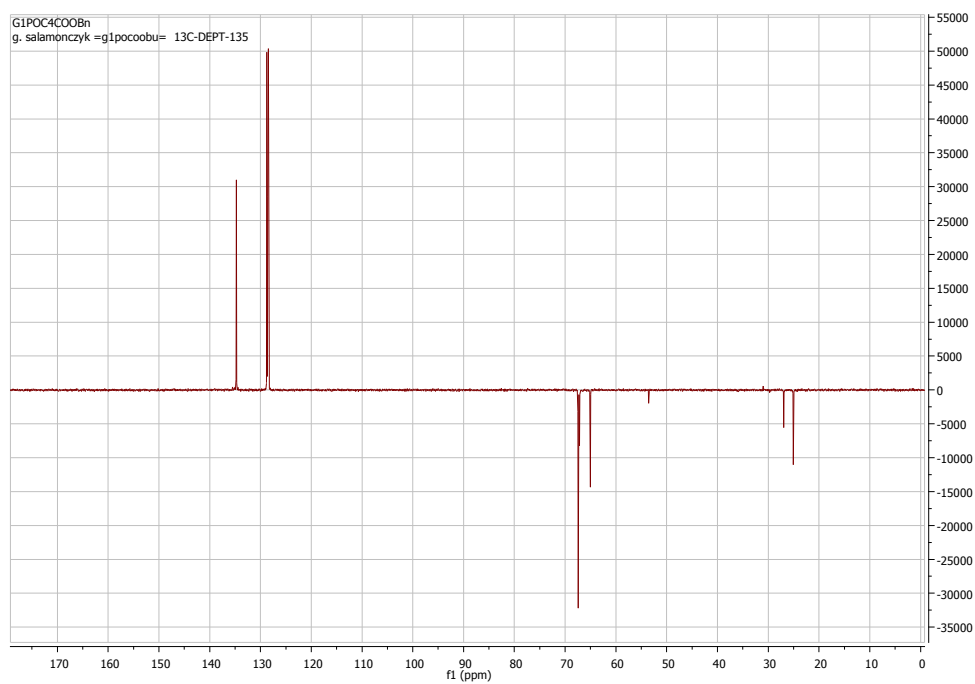

# <sup>31</sup>P NMR

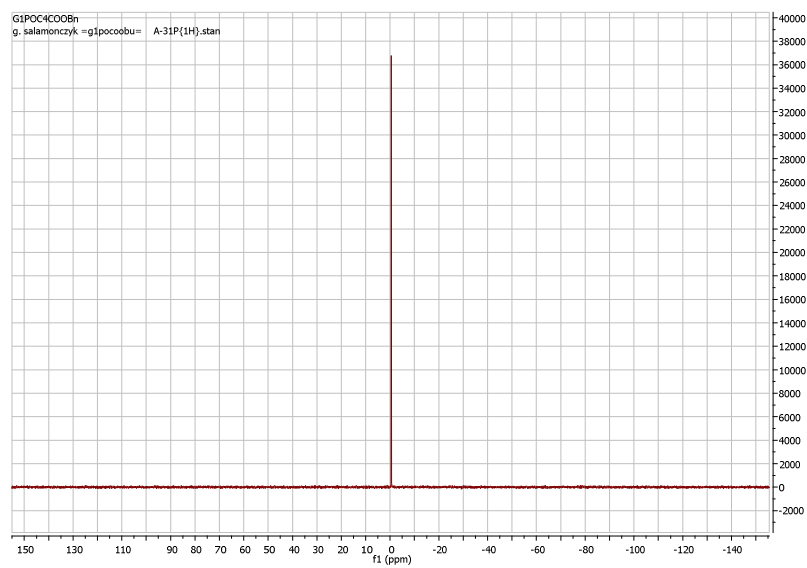

## Mass Spectrum

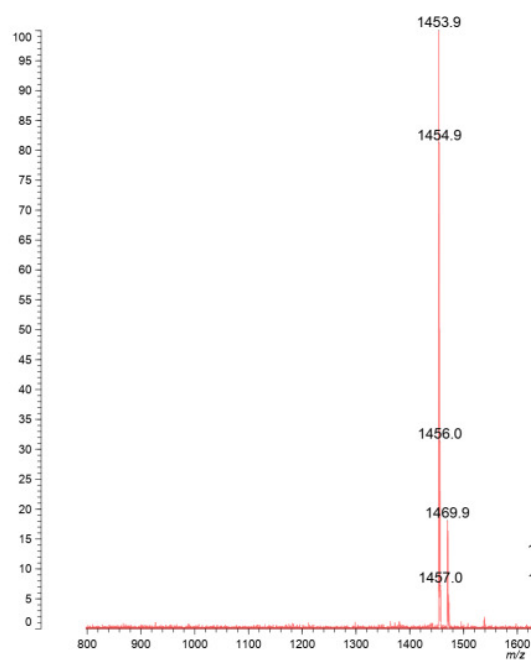

## Spectra of the dendrimer **5** (**6**)

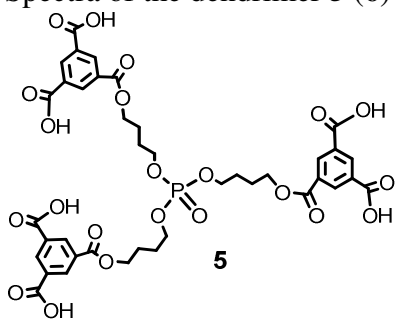

### $^1\text{H} \{^3\text{1P}\}$ NMR

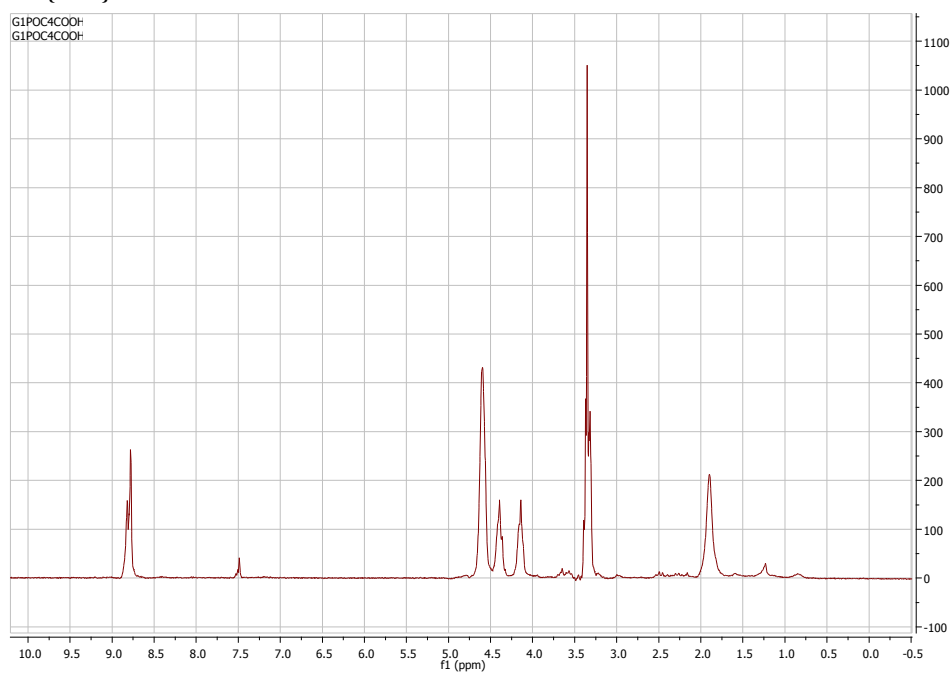

### $^{13}\text{C}$ NMR

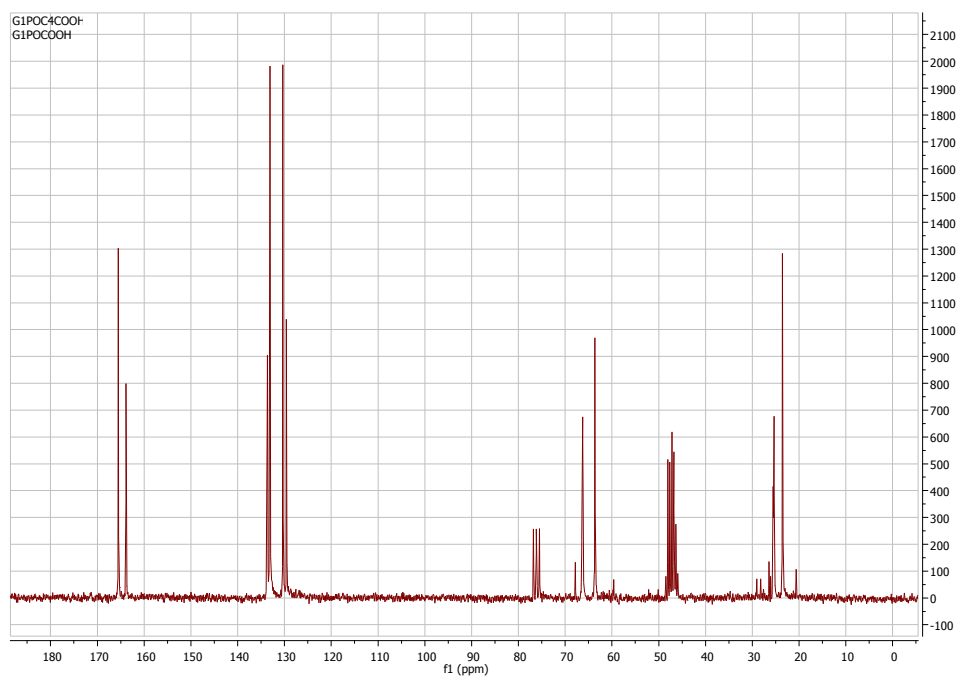



## $^{31}\text{P}$ NMR

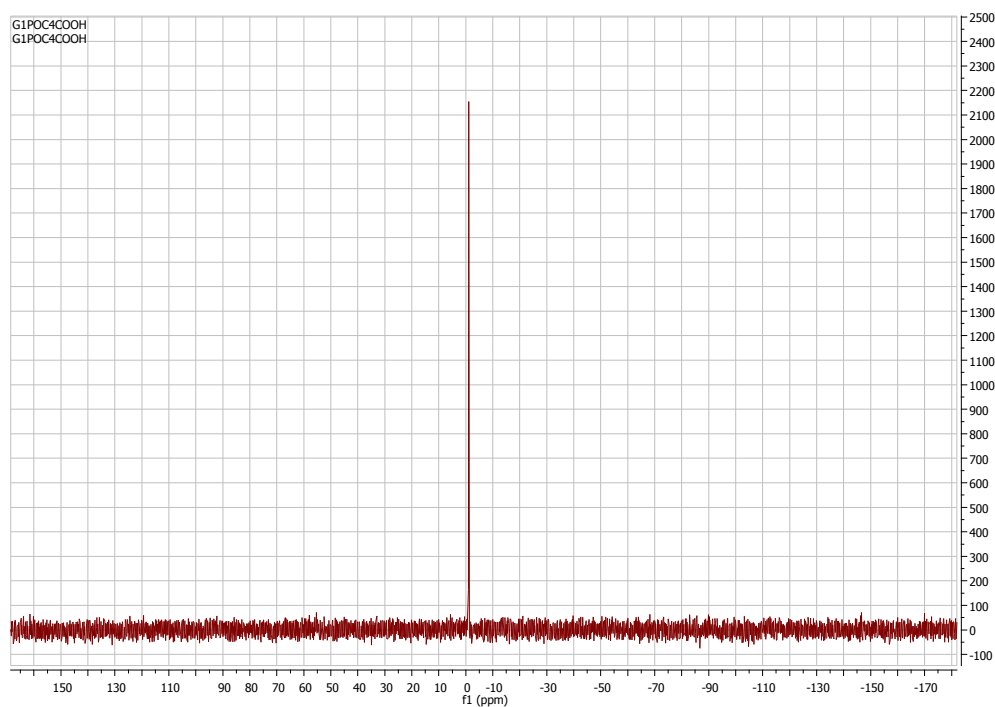

## Mass Spectrum

Salamonczyk  
200210\_G1POCHCOOHA 33 (0.357) Cm (19:62-2:16)

TOF MS ES-  
1.13e7

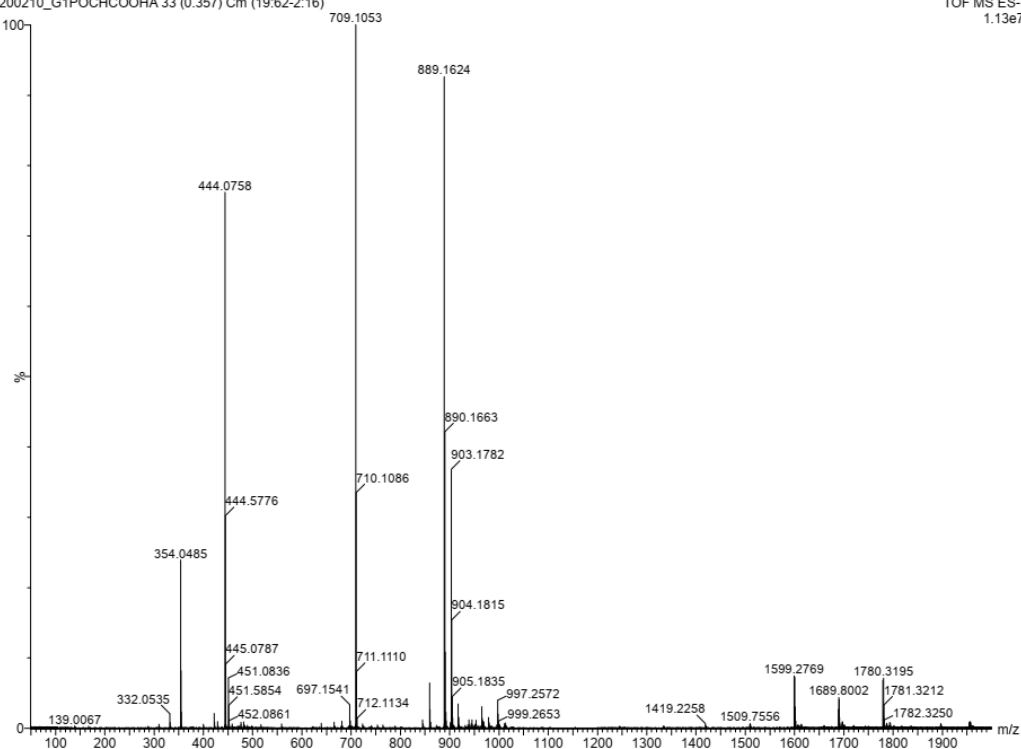

## Spectra of the dendrimer **7**

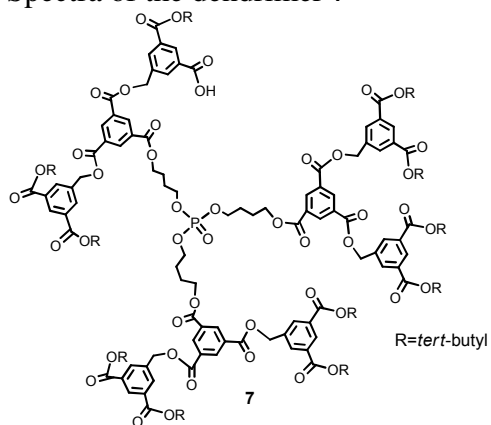

### $^1\text{H}$ NMR

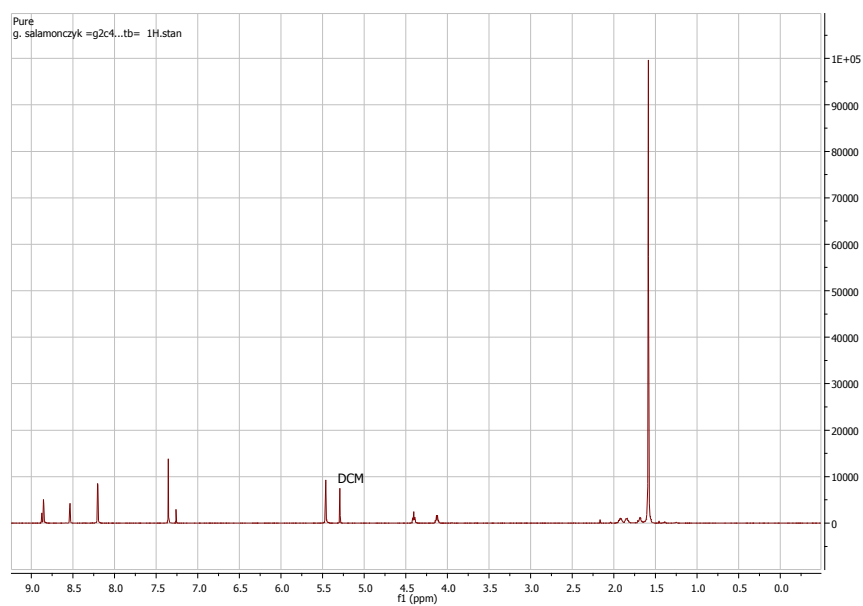

### $^1\text{H} \{^3\text{P}\}$ NMR

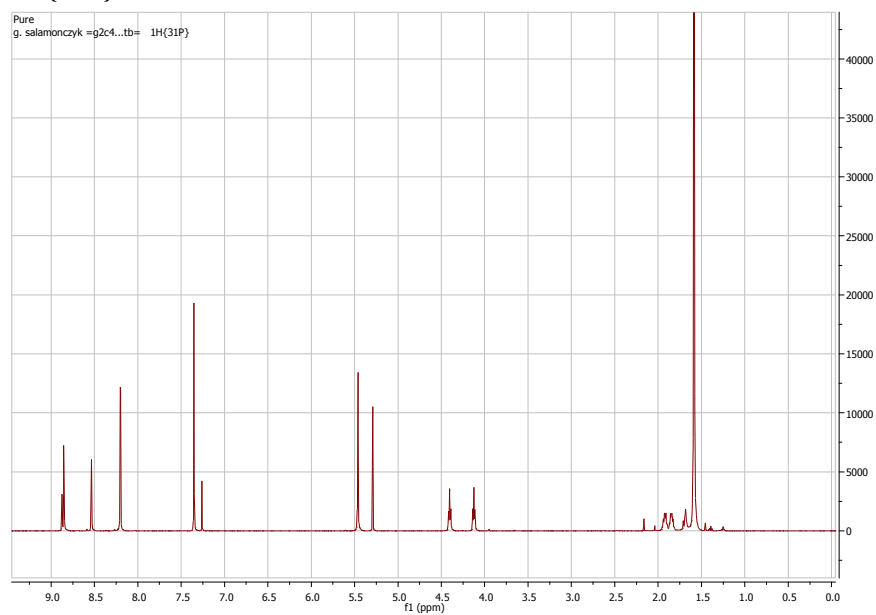

# <sup>13</sup>C NMR

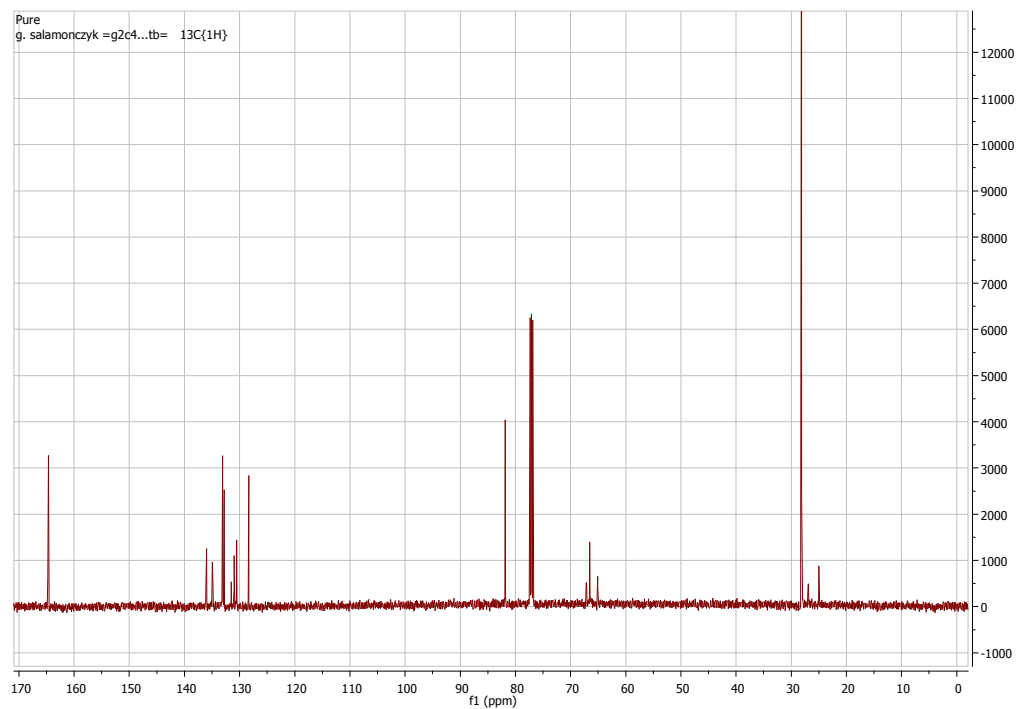

# <sup>13</sup>C DEPT-135 NMR

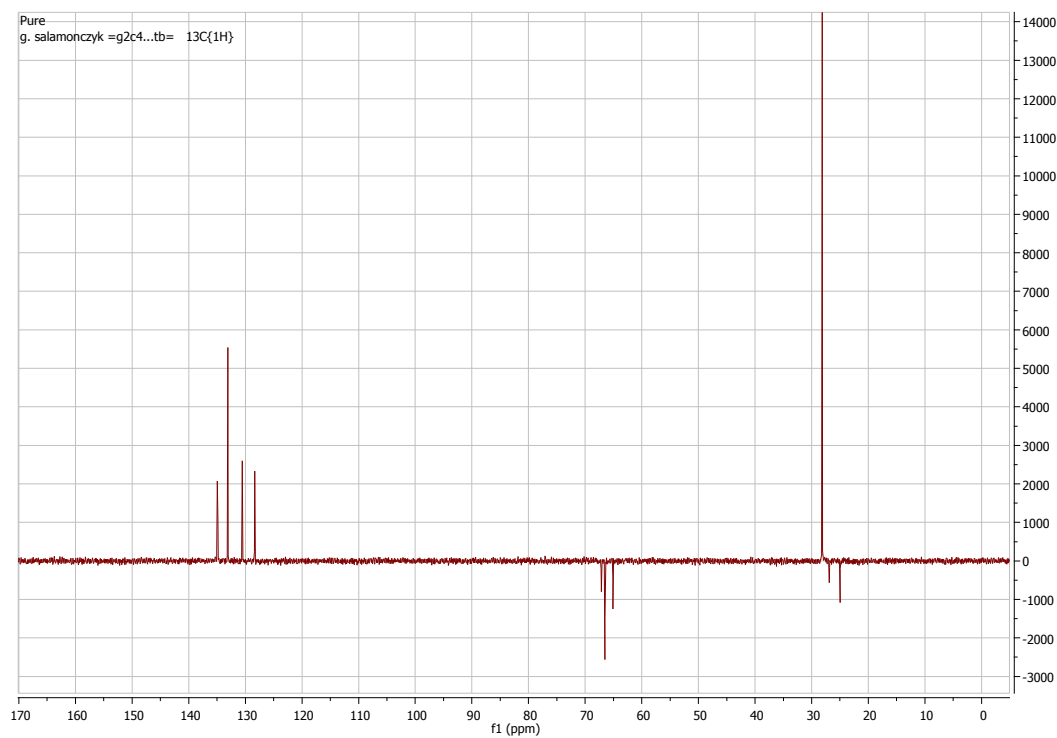

## $^{31}\text{P}$ NMR

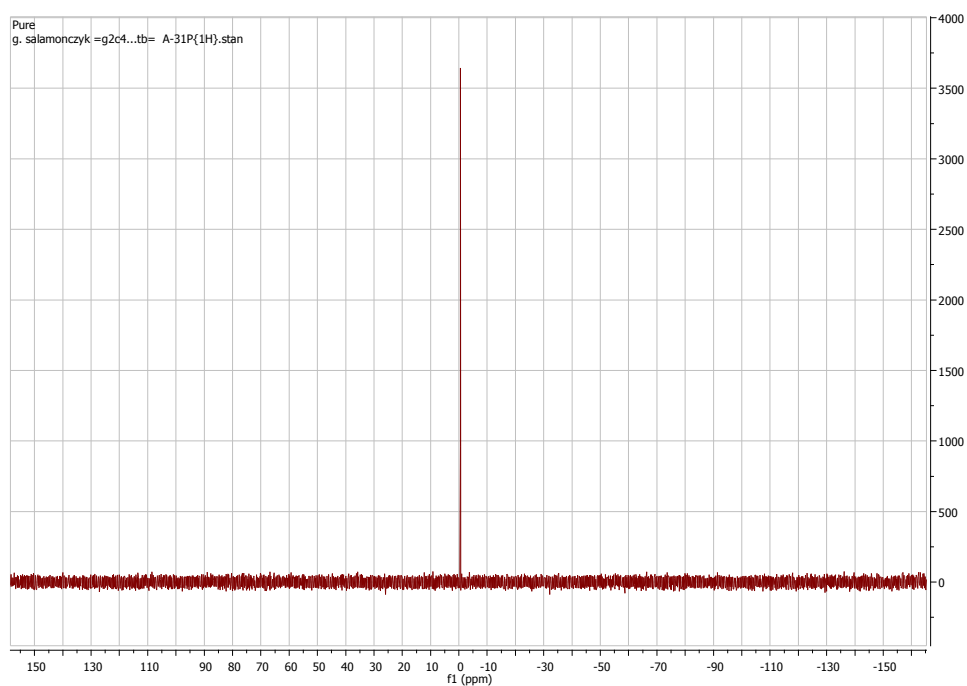

## Mass Spectrum

G.Salamonczyk, G2C4POCOCOOTB; linear pos

Data: hr870001.F8[c] 10 Jul 2020 13:01 Cal: PEG 2000 (06/2020) 22 Jun 2020 12:42  
Shimadzu Biotech Axima Performance 2.9.1.20100121: Mode Linear\_2018, Power: 80, Blanked, P.Ext. @ 3000 (bin 78)  
%Int. 1.3 mV[sum= 266 mV] Profiles 1-200 Smooth Av 5 -Baseline 20

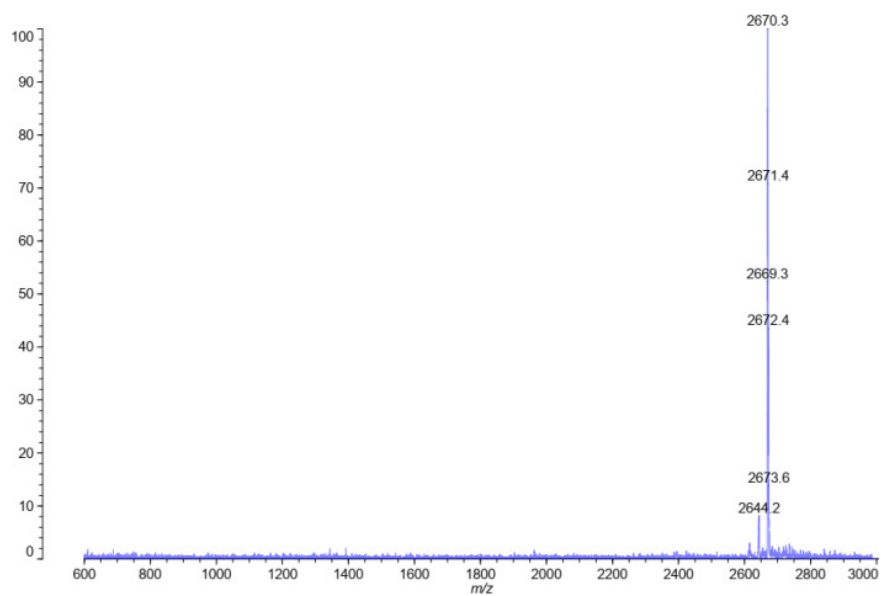

## Spectra of the dendrimer **8** (9)

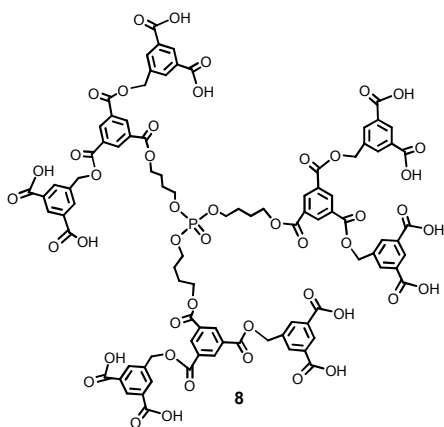

### $^1\text{H}$ NMR

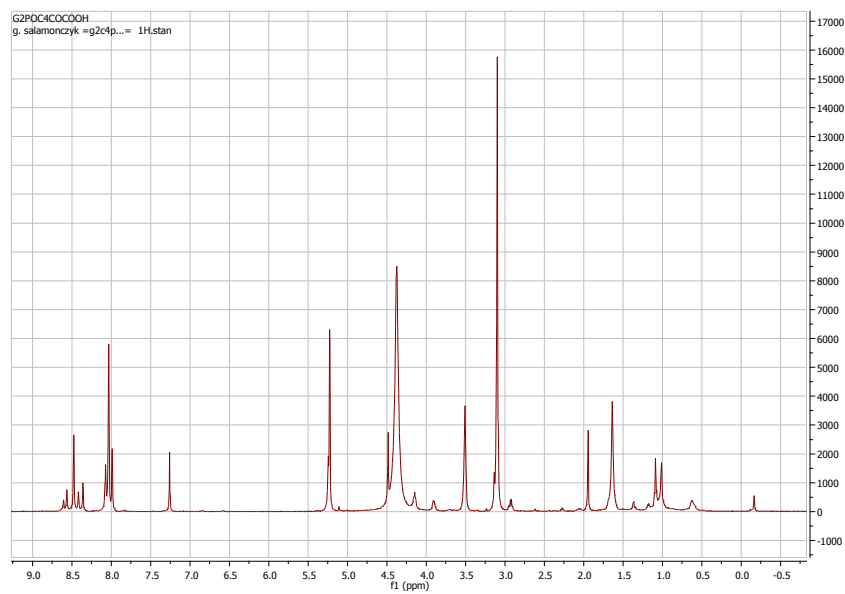

### $^1\text{H} \{^3\text{P}\}$ NMR

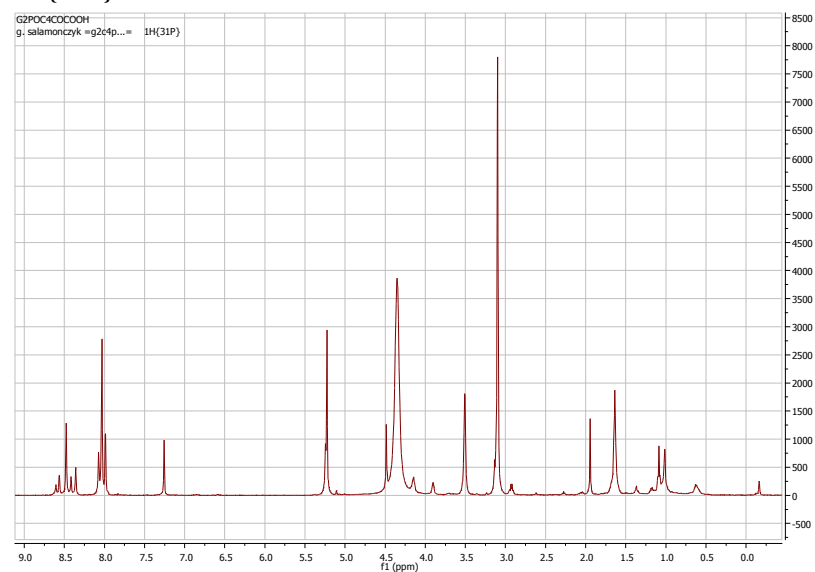

### $^{31}\text{P}$ NMR

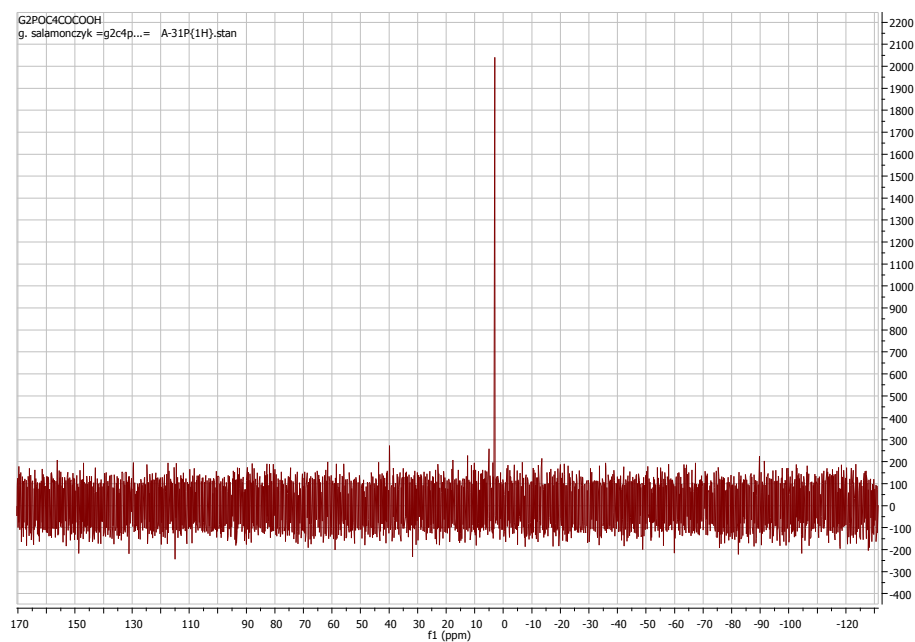

## Mass Spectrum

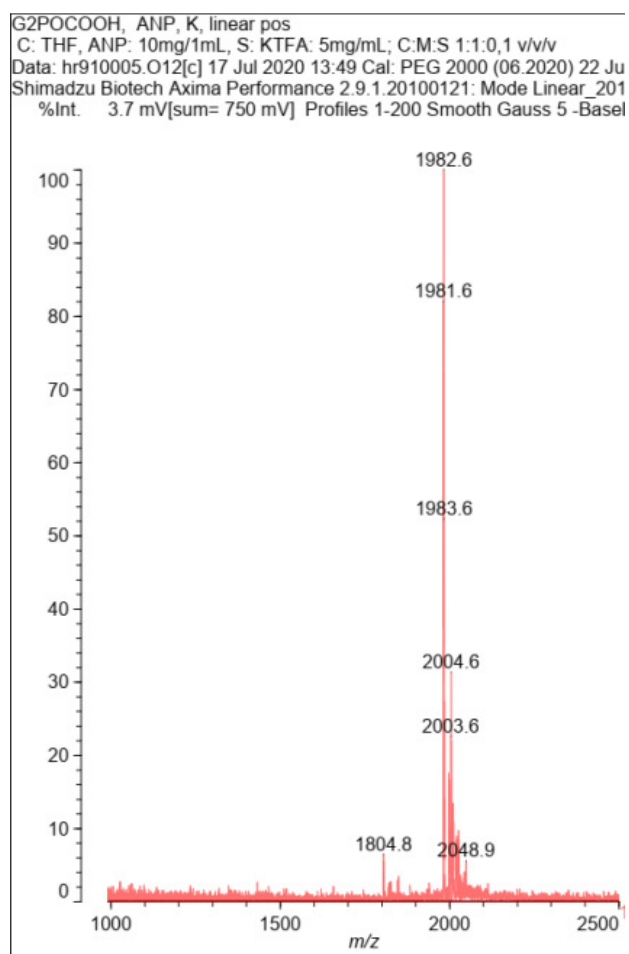

## Spectra of the dendrimer **10**

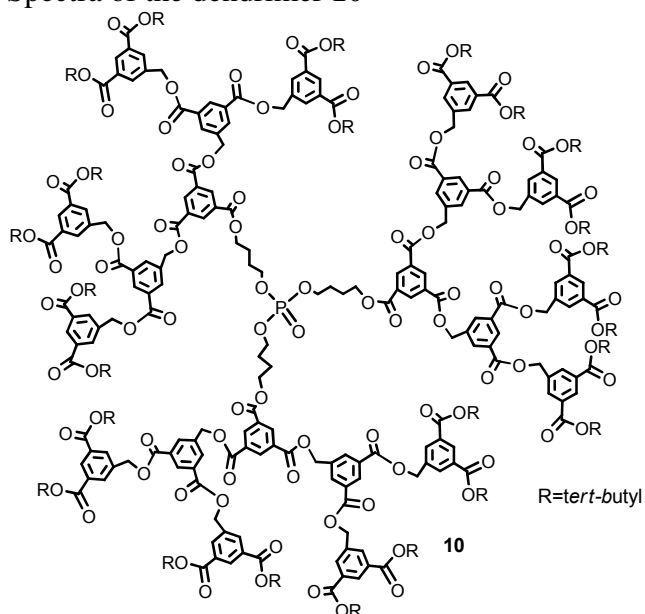

## <sup>1</sup>H NMR

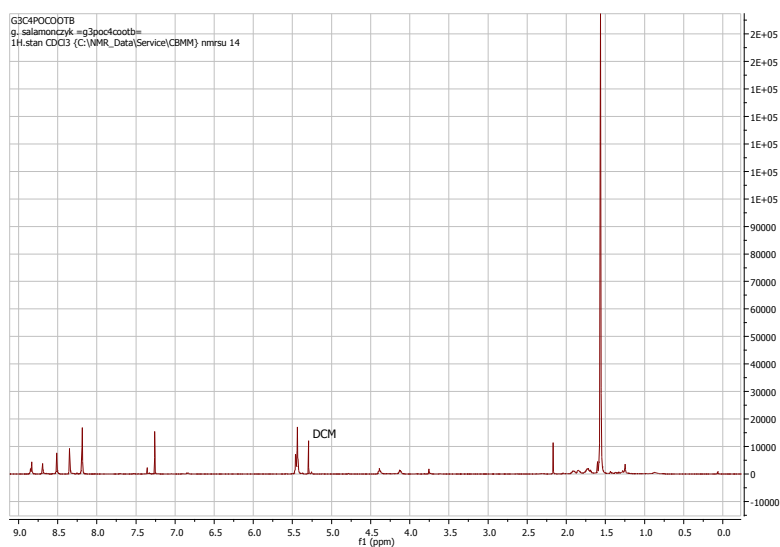

## <sup>1</sup>H NMR – aromatic range expansion

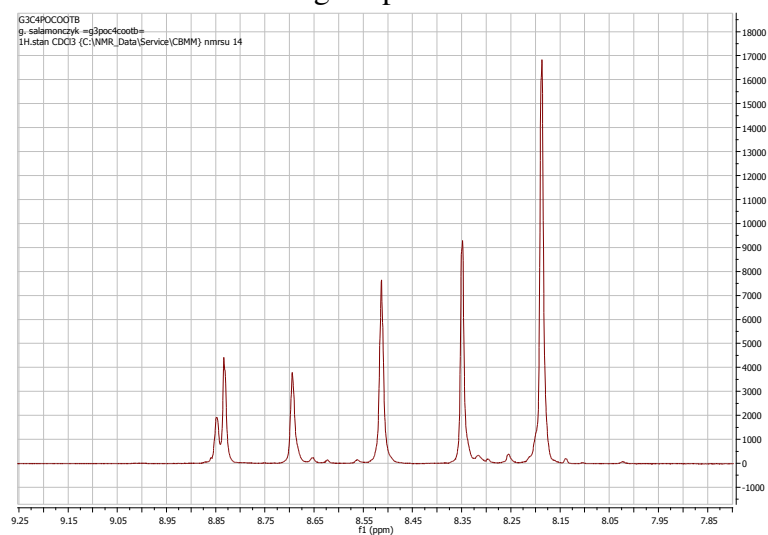

## $^{13}\text{C}$ NMR

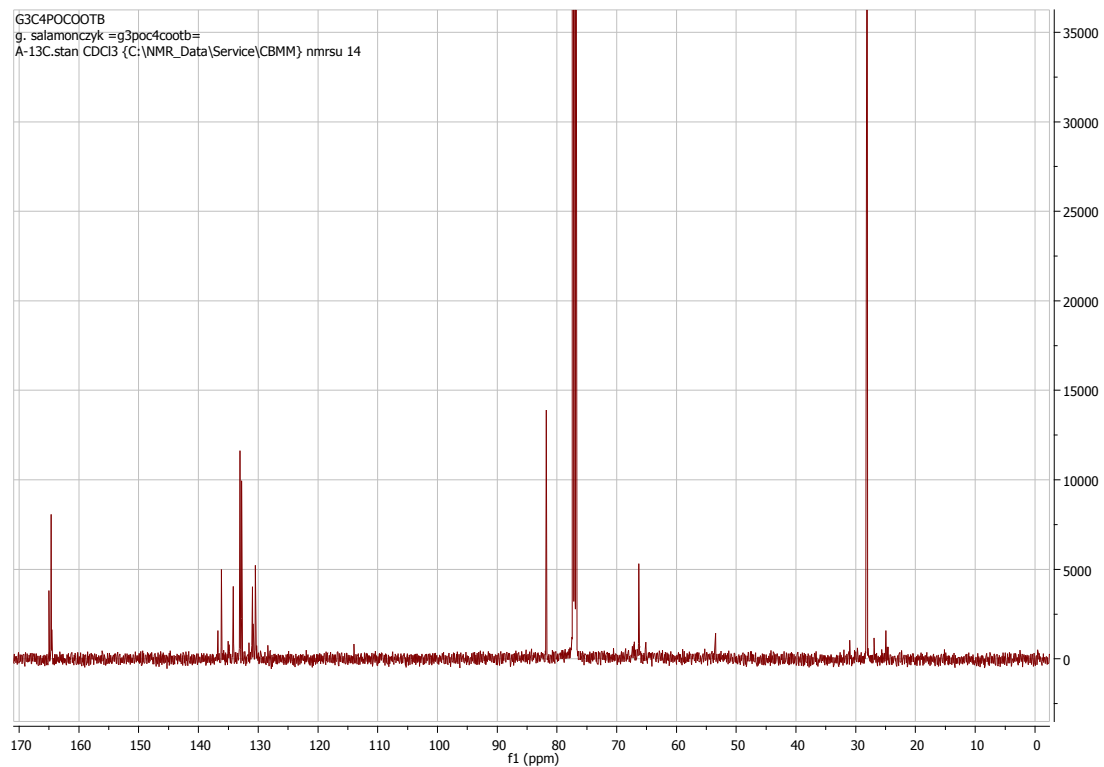

## $^{13}\text{C}$ NMR – aromatic and carbonyl range expansion

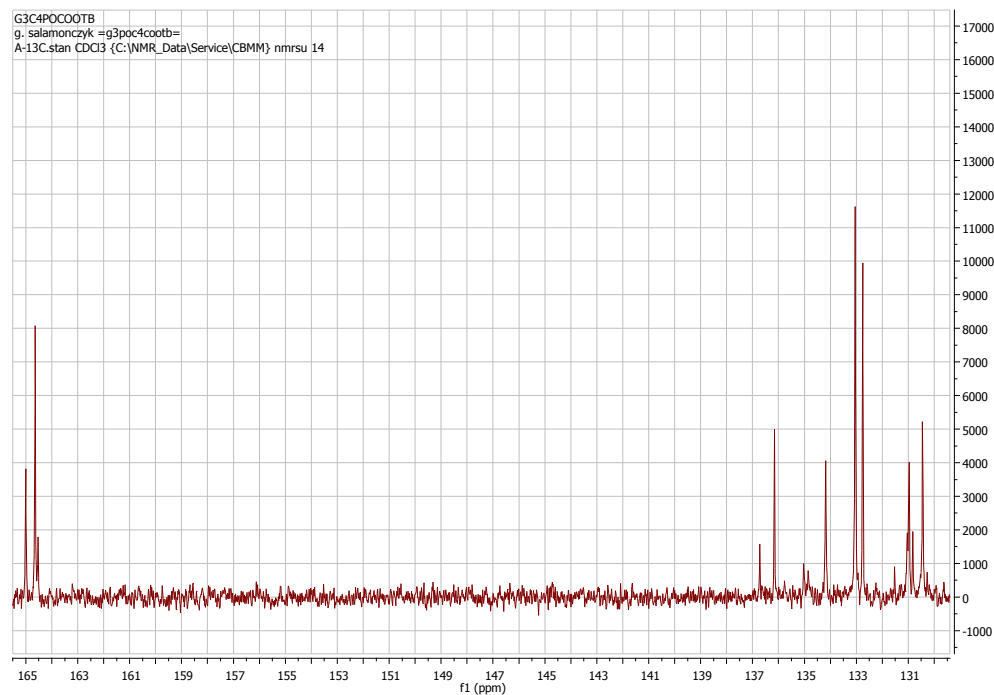



### $^{13}\text{C}$ NMR – DEPT 135

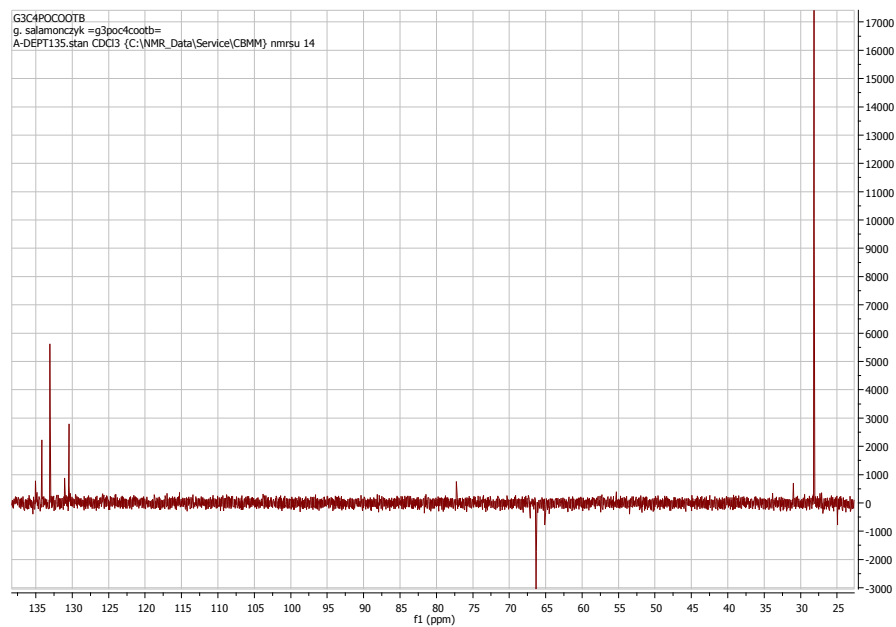

### $^{31}\text{P}$ NMR

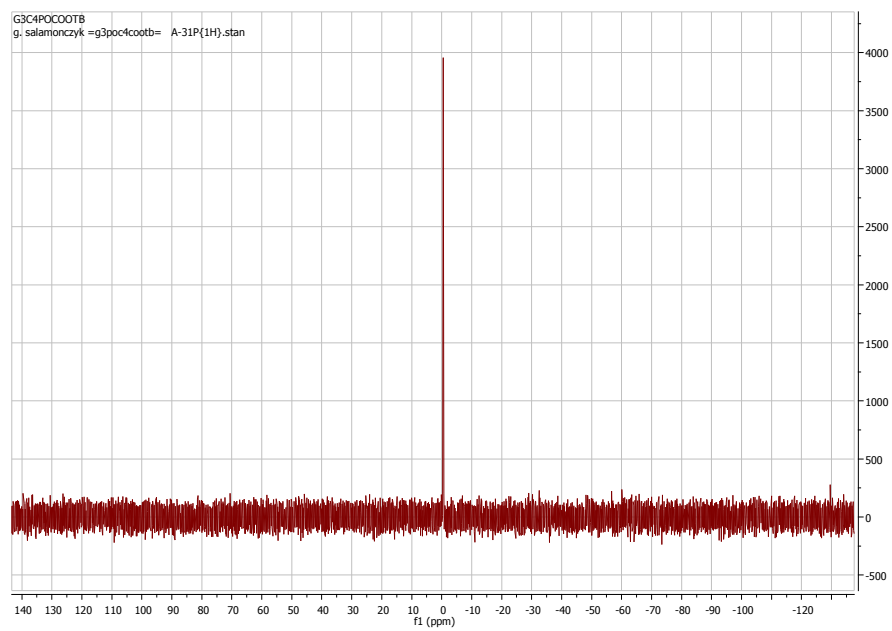

## MALDI TOF Mass Spectrum

iC4POCOOTB; linear pos  
THF; M: DCTB 10mg/1ml CH<sub>2</sub>Cl<sub>2</sub>; S: KTFA 5mg/1ml H<sub>2</sub>O, P/M/S 10/10/1 v/v/v  
ta: hw480003.D20[c] 4 Sep 2020 13:07 Cal: PEG 2000 (06.2020) 22 Jun 2020 12:42  
1.9 mV[sum= 372 mV] Profiles 1-200 Smooth Av 5 -Baseline 60

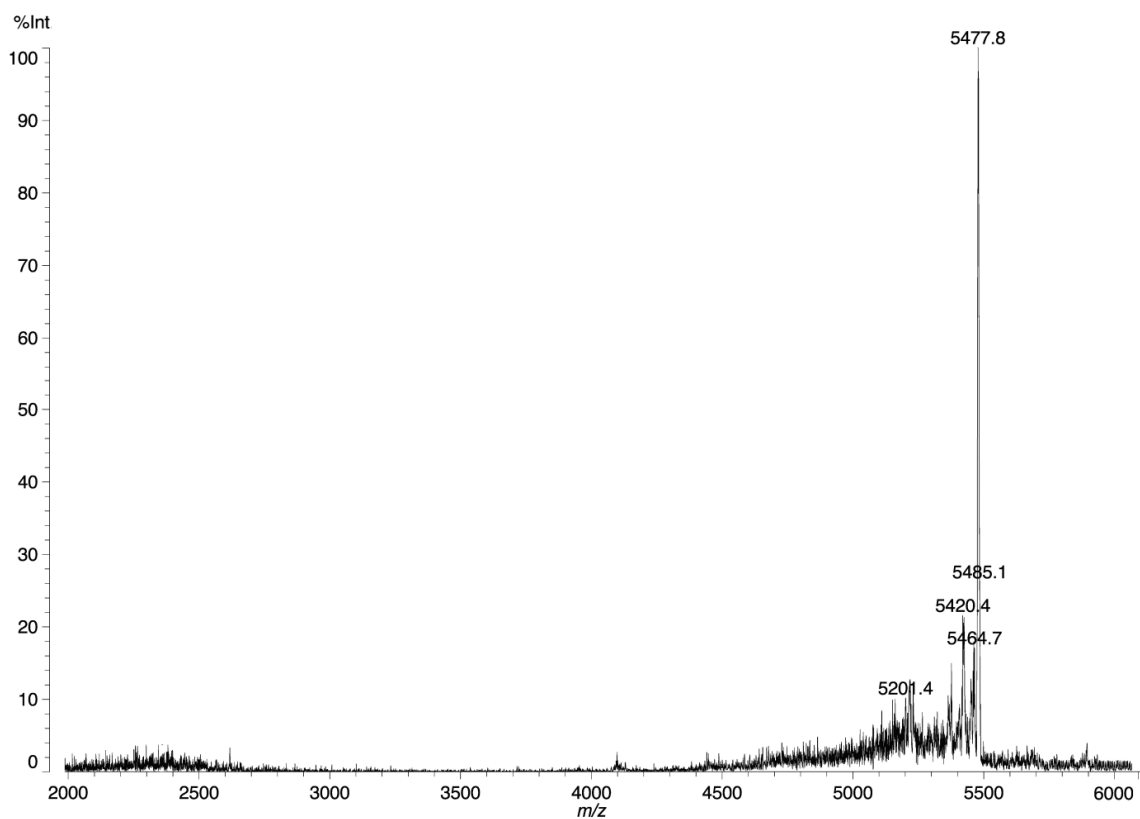

## Spectra of the dendrimer **11** (**12**)

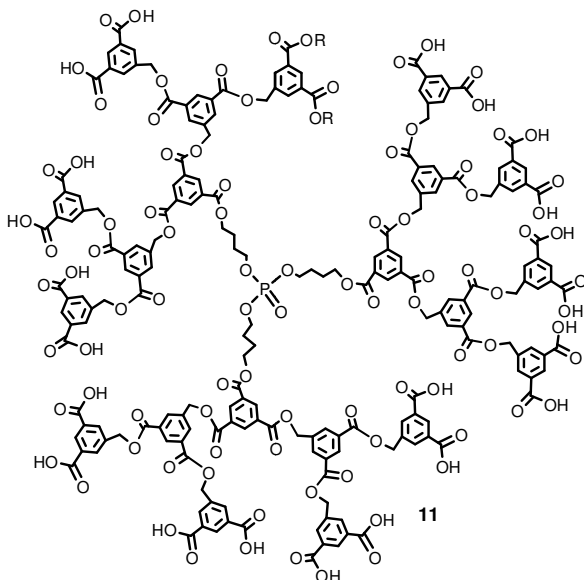

# $^1\text{H}$ NMR

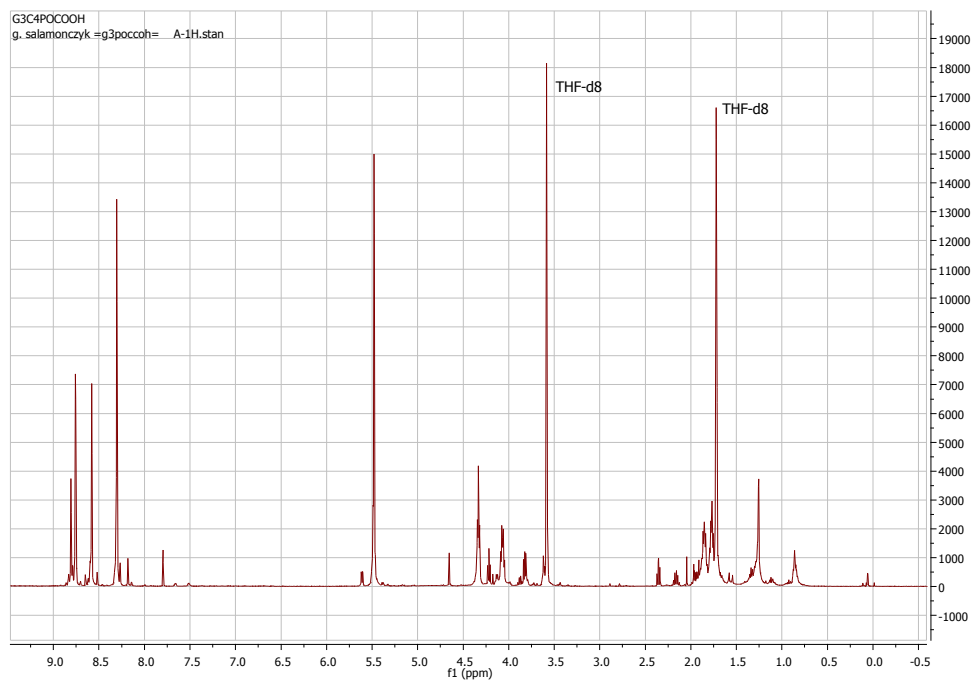

# $^1\text{H} \{^3\text{P}\}$ NMR

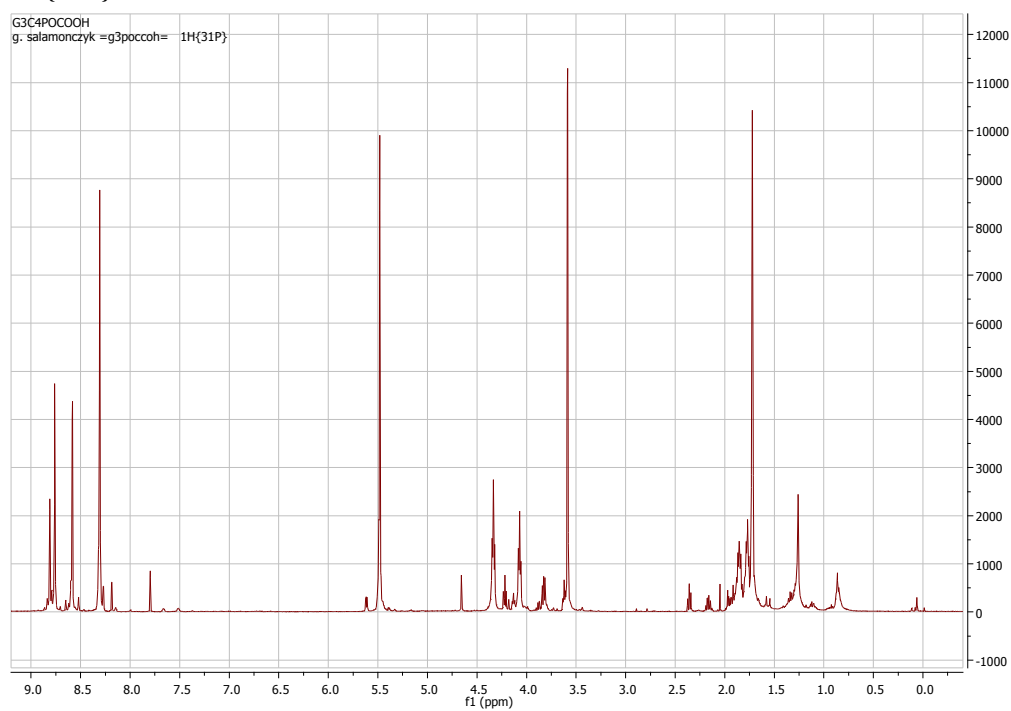

## $^{13}\text{C}$ NMR

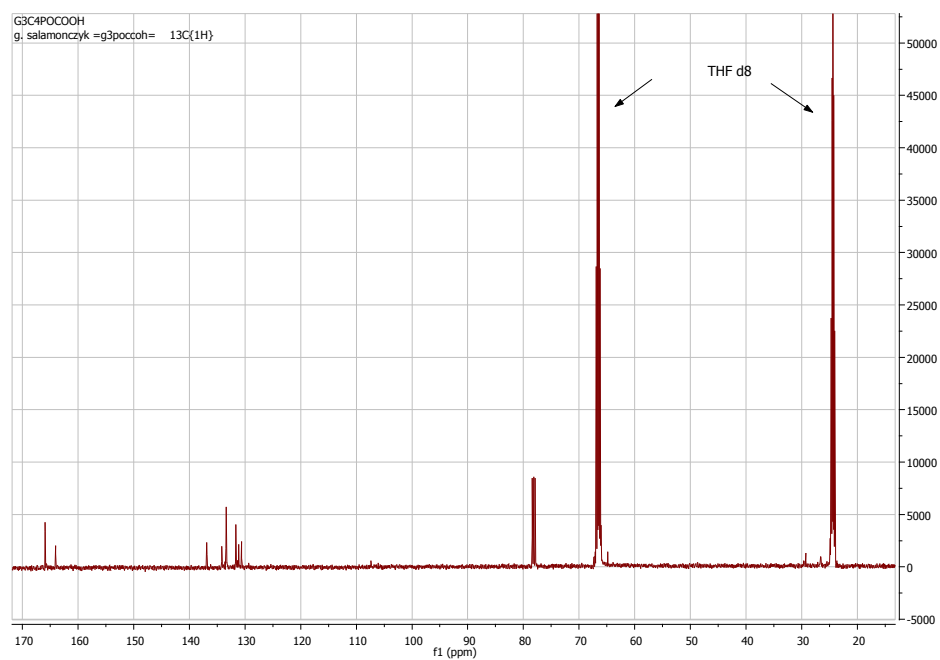

## $^{13}\text{C}$ NMR – aromatic and carbonyl range expansion

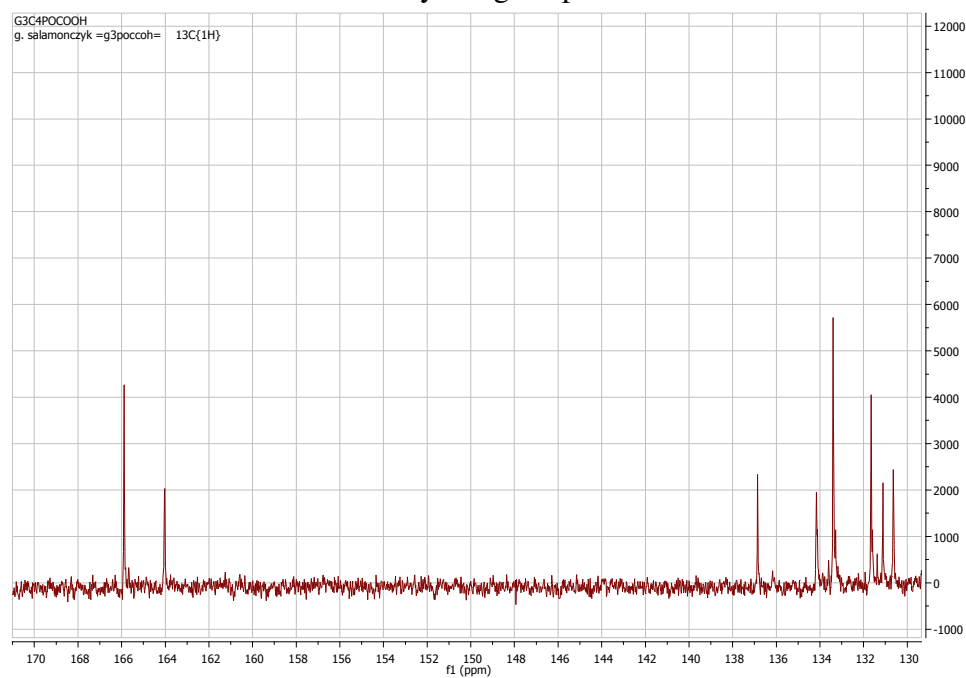

### $^{31}\text{P}$ NMR

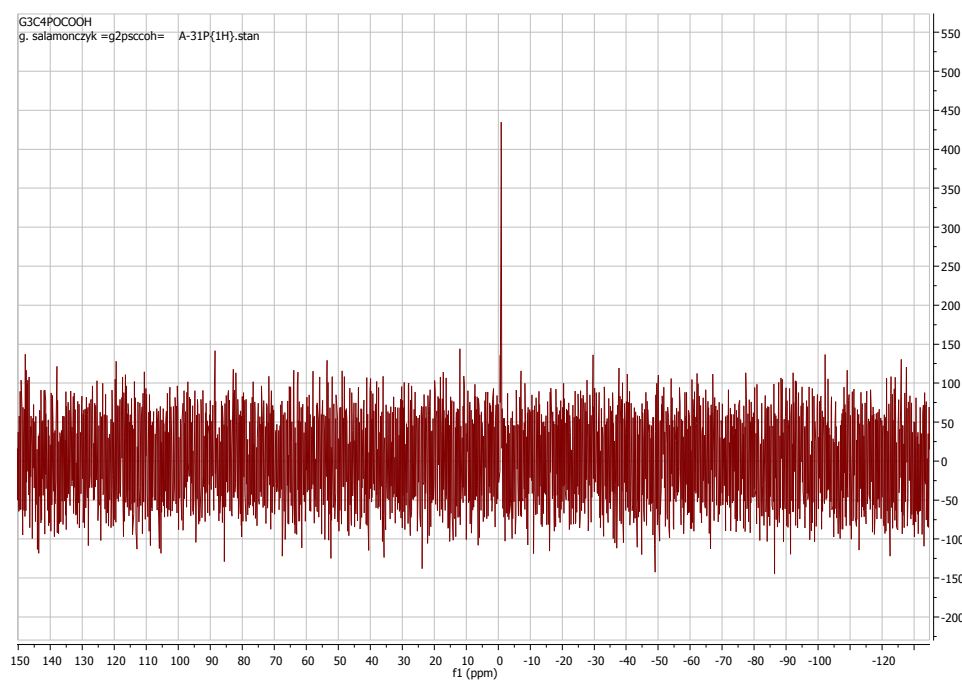

### Spectra of the dendrimer **14**

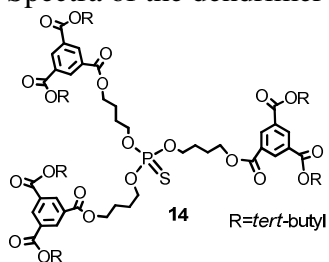

### $^1\text{H}$ NMR

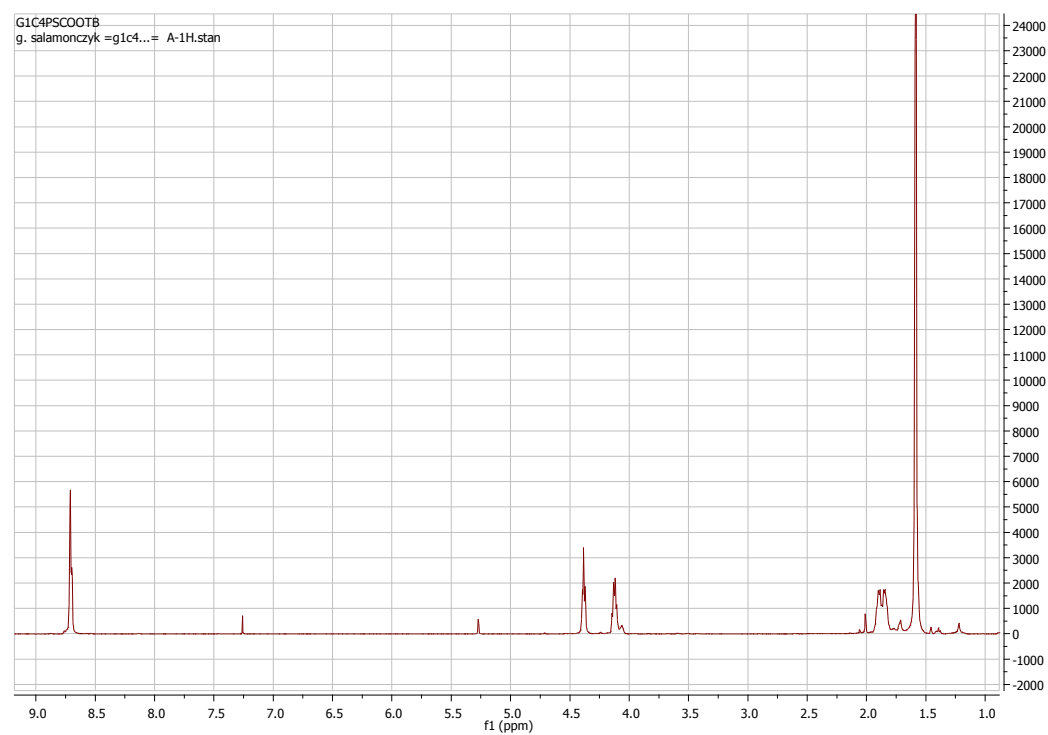

# $^1\text{H} \{^3\text{P}\}$ NMR

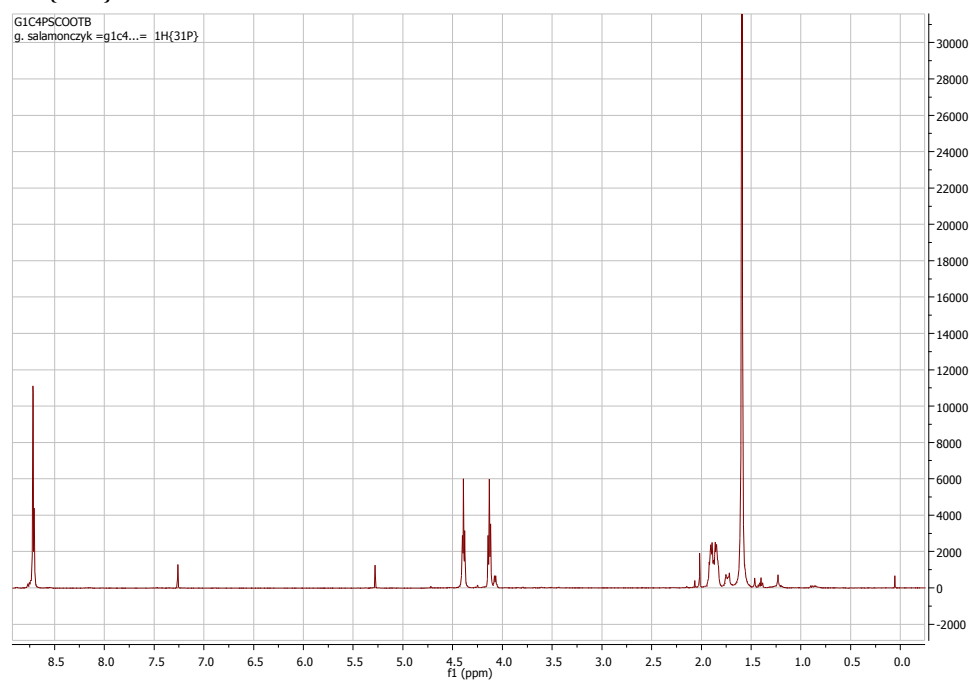

# $^{13}\text{C}$ NMR

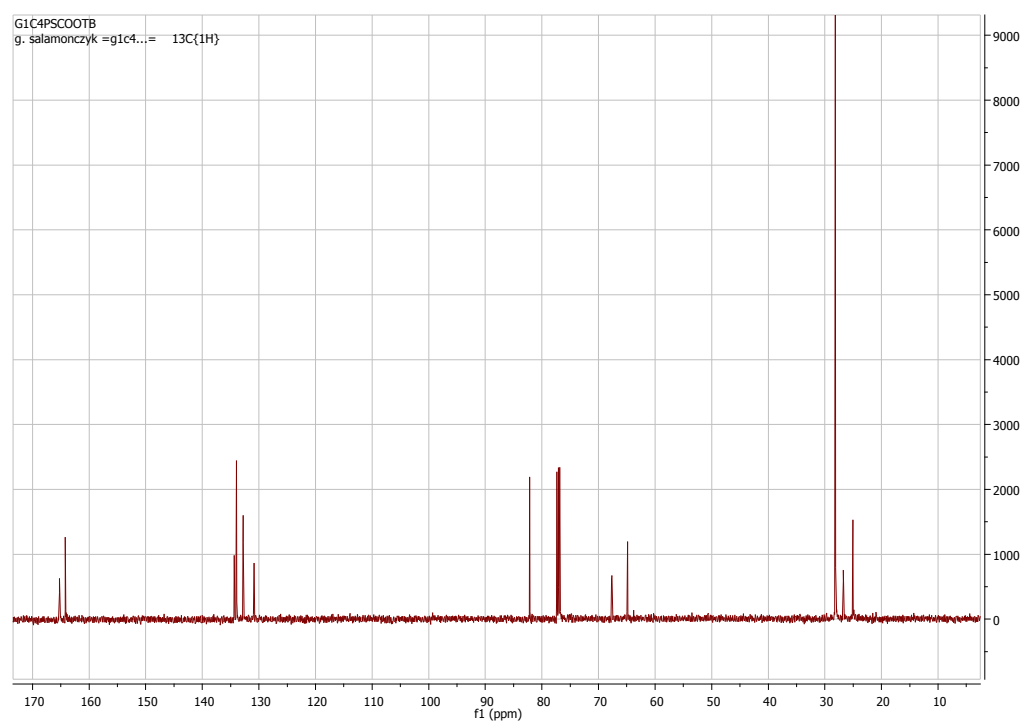

## $^{13}\text{C}$ NMR – DEPT 135

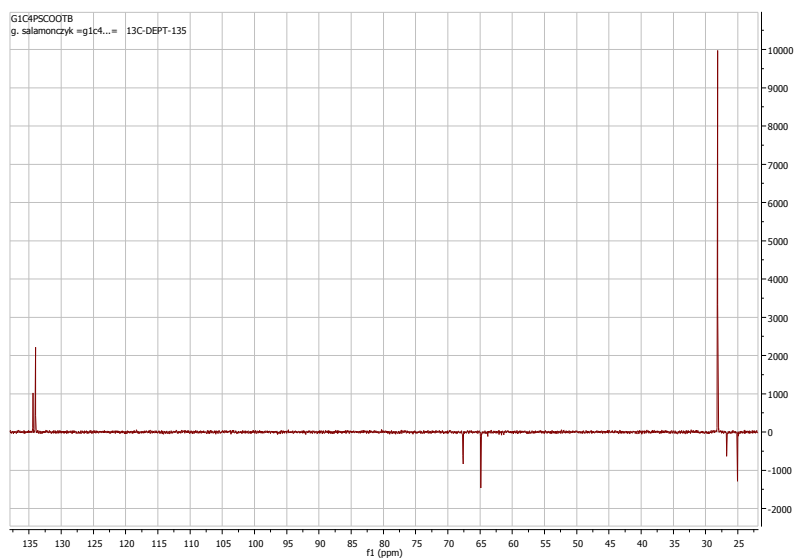

## $^{31}\text{P}$ NMR

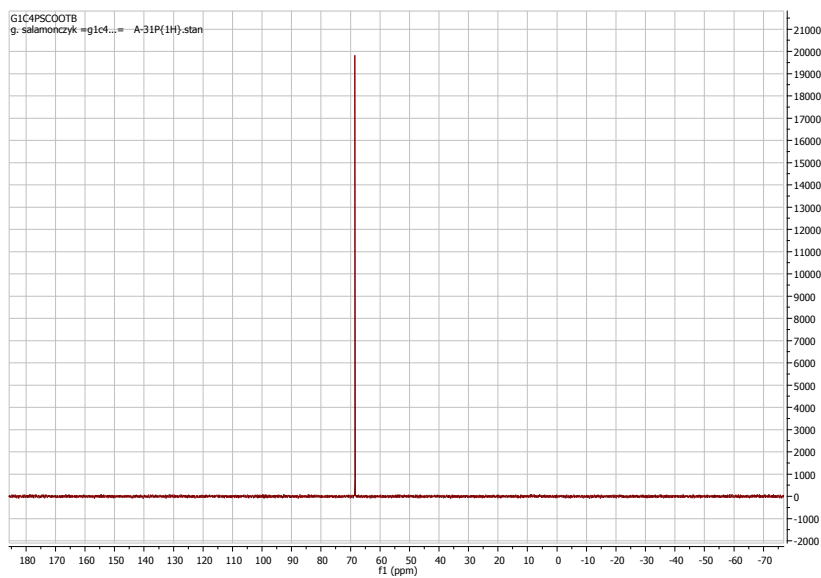

## Mass Spectrum

G1PSCOOTB, ANP, K, linear pos  
C: THF, ANP: 10mg/mL, S: KTFA: 5mg/mL; C:MS 1:1:0.1 v/v/v  
Data: hr910001.K1[c] 17 Jul 2020 12:25 Cal: PEG 2000 (110) 10.19 29 Oct 2019 11:50  
Shimadzu Biotech Axima Performance 2.9.1.20100121: Mode Linear, 2018, Power: 67, Blanked, P.Ext. @ 2000 (bin 64)  
%Int. 4.8 mV[sum= 960 mV] Profiles 1-200 Smooth Gauss 5-Baseline 60

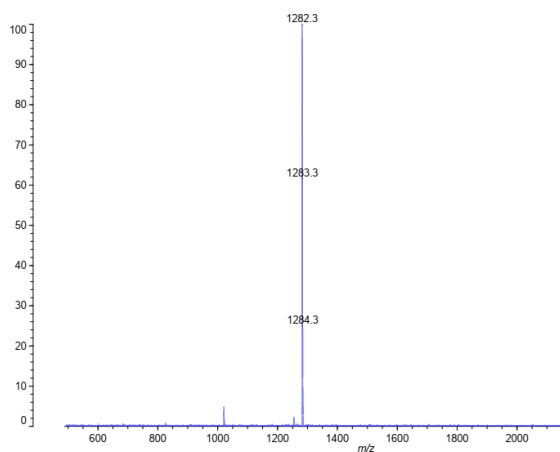

## Spectra of the dendrimer **15** (**16**)

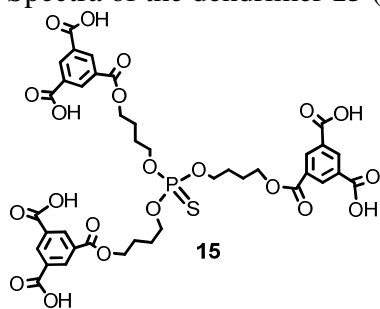

### $^1\text{H}$ NMR

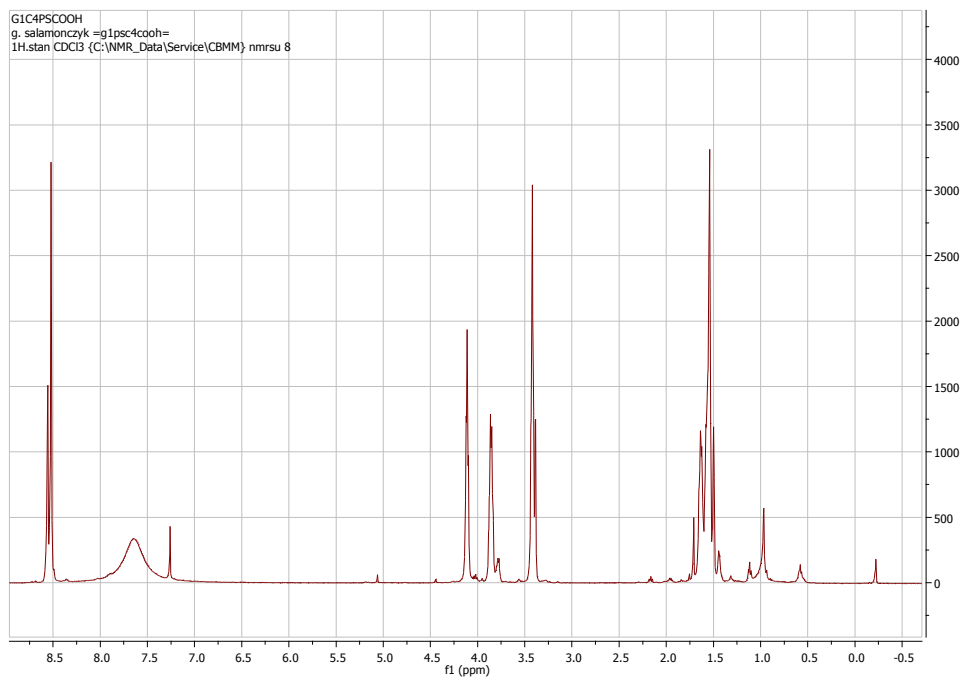

### $^{13}\text{C}$ NMR

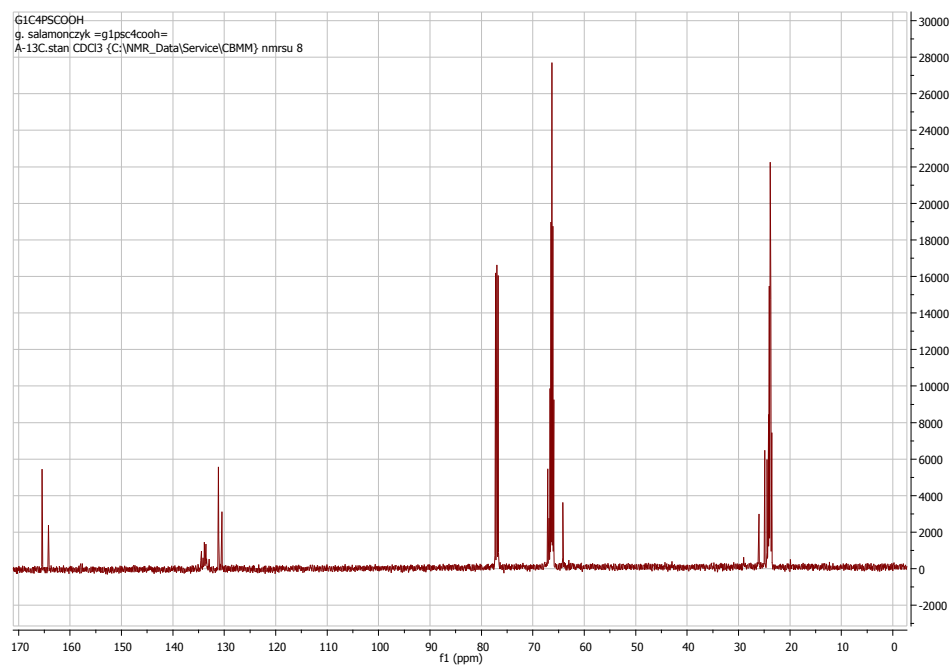



# <sup>31</sup>P NMR

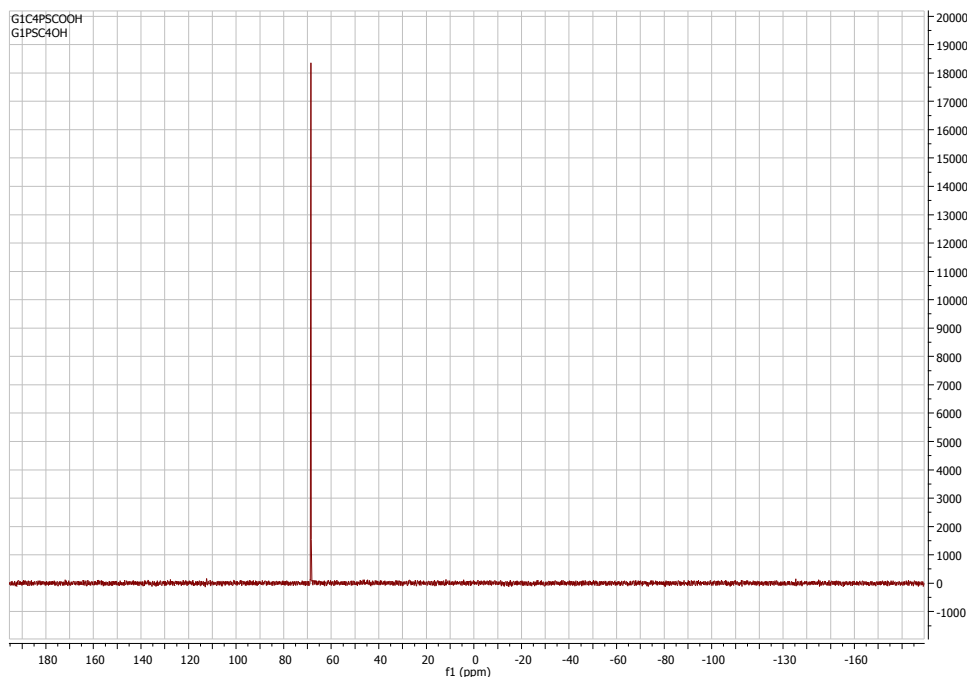

## Mass Spectrum

### Elemental Composition Report

Page 1

#### Single Mass Analysis

Tolerance = 5.0 PPM / DBE: min = -1.5, max = 70.0

Element prediction: Off

Number of isotope peaks used for i-FIT = 9

Monoisotopic Mass, Odd and Even Electron Ions

409 formula(e) evaluated with 6 results within limits (all results (up to 1000) for each mass)

Elements Used:

C: 0-45 H: 0-45 O: 0-25 P: 0-2 S: 0-2

200831\_G1PSC4COOHn1A 46 (0.480) Cm (46:72-2:38)

TOF MS E  
9.37e+0

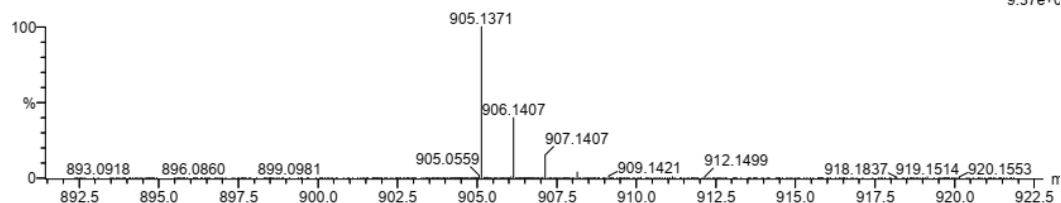

Minimum: -1.5  
Maximum: 70.0

| Mass     | Calc. Mass | mDa  | PPM  | DBE  | i-FIT  | Norm   | Conf(%) | Formula          |
|----------|------------|------|------|------|--------|--------|---------|------------------|
| 905.1371 | 905.1364   | 0.7  | 0.8  | 21.5 | 1913.6 | 2.795  | 6.11    | C39 H38 O21 P S  |
|          | 905.1398   | -2.7 | -3.0 | 16.5 | 1920.2 | 9.318  | 0.01    | C36 H42 O21 P S2 |
|          | 905.1340   | 3.1  | 3.4  | 12.5 | 1910.9 | 0.074  | 92.82   | C32 H43 O24 P2 S |
|          | 905.1339   | 3.2  | 3.5  | 25.5 | 1922.3 | 11.459 | 0.00    | C43 H38 O16 P S2 |
|          | 905.1330   | 4.1  | 4.5  | 26.5 | 1915.9 | 5.071  | 0.63    | C42 H34 O21 P    |
|          | 905.1413   | -4.2 | -4.6 | 26.5 | 1916.3 | 5.452  | 0.43    | C42 H33 O23      |

## Spectra of the dendrimer **17**

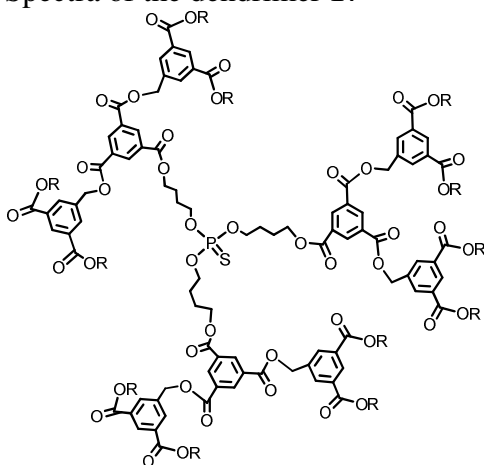

### $^1\text{H}$ NMR

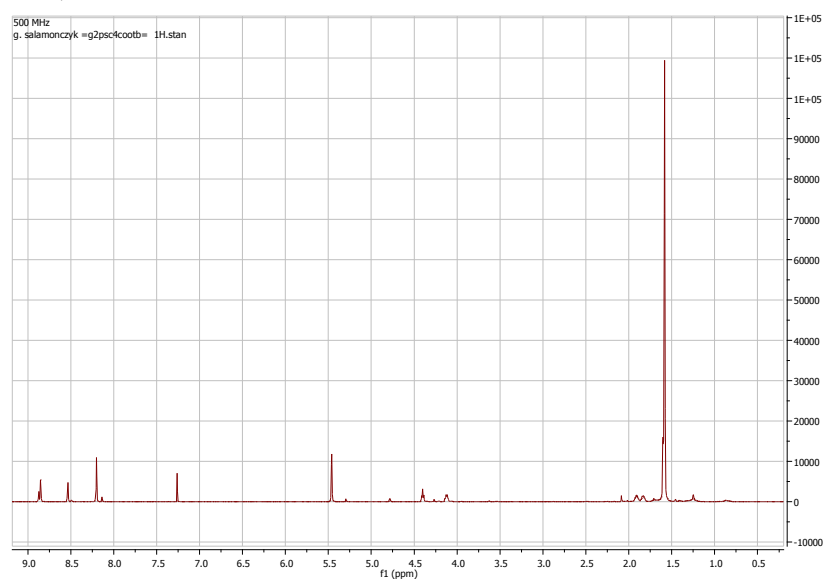

### $^1\text{H}$ $\{^3\text{P}\}$ NMR

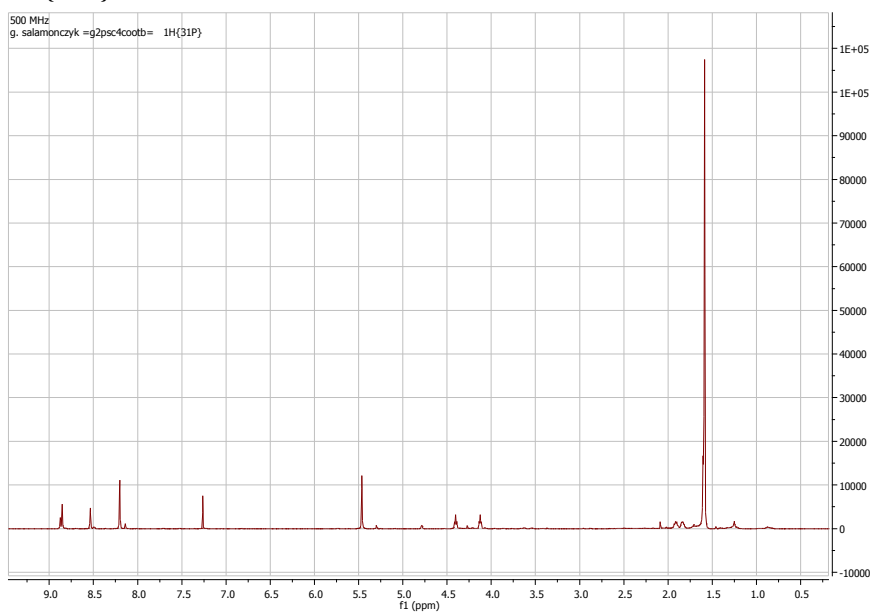

## $^{13}\text{C}$ NMR

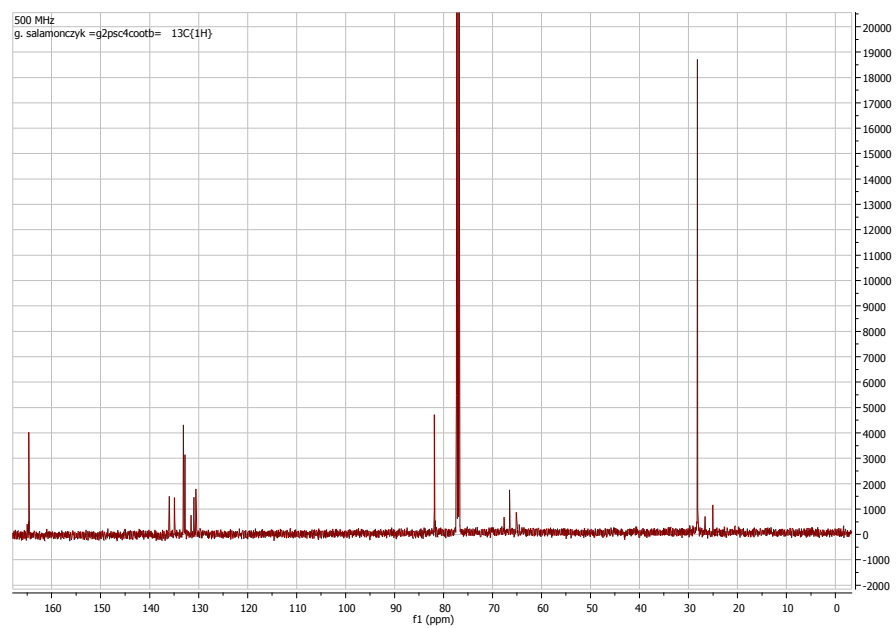

## $^{13}\text{C}$ NMR – DEPT 135

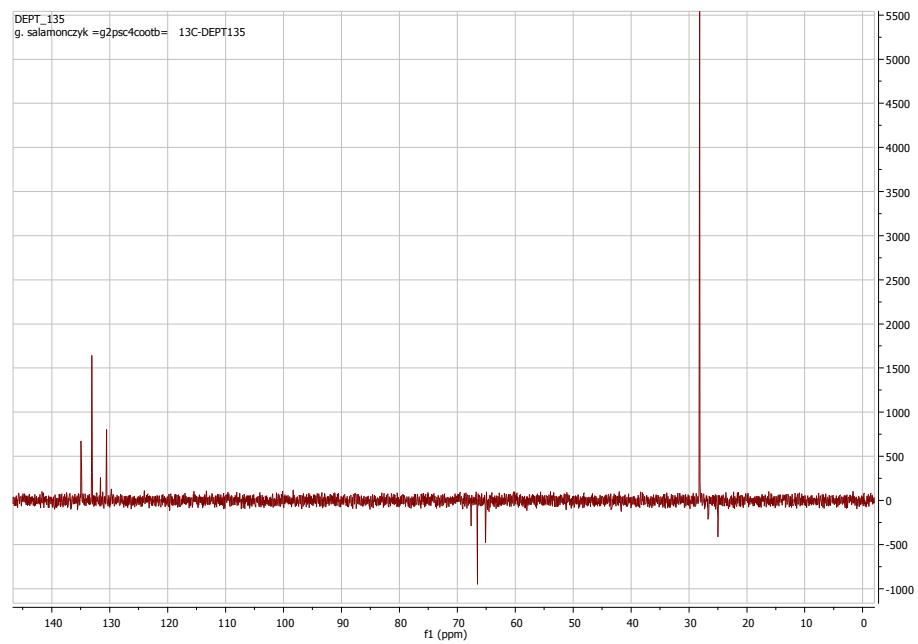

## <sup>31</sup>P NMR

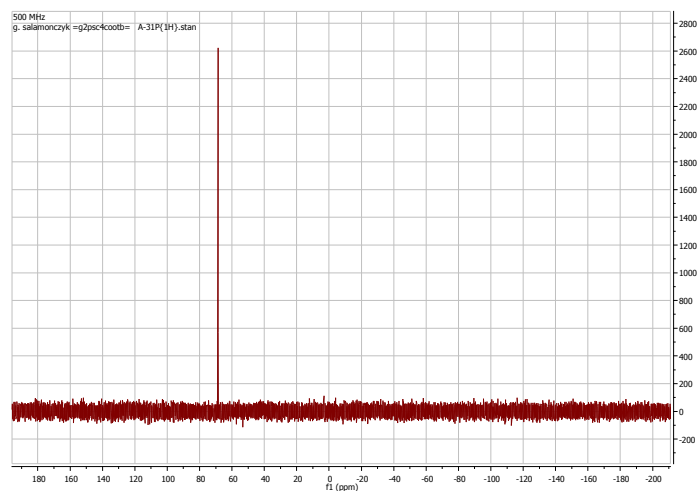

## Mass Spectrum

G2C4PSCOOTB, linear pos  
C: THF, M: DCTB 10mg/1ml CH<sub>2</sub>Cl<sub>2</sub>, S: KTFA 5mg/1ml H<sub>2</sub>O, P/M/S 10/10/1 v/v/v  
Data: hw490003.H19[c] 4 Sep 2020 13:19 Cal: PEG 2000 (06/2020) 22 Jun 2020 12:42  
%Int. 6.4 mV[sum= 1270 mV] Profiles 1-200 Smooth Av 10 -Baseline 80

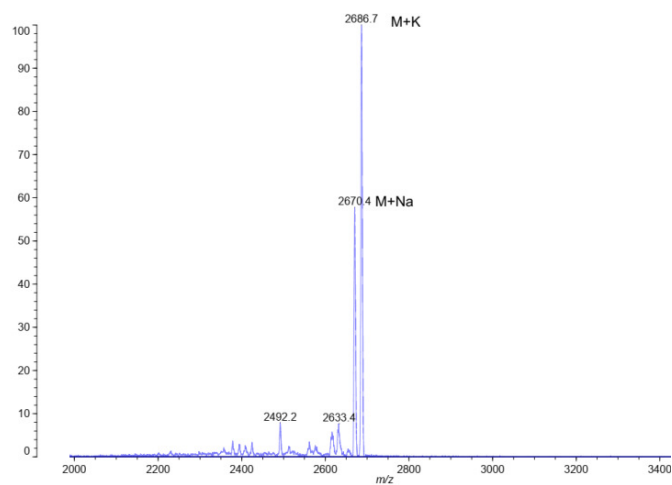

## Spectra of the dendrimer **18** (**19**).

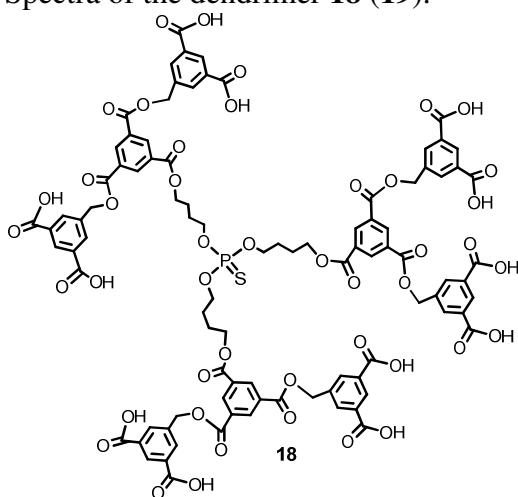

# $^1\text{H}$ NMR

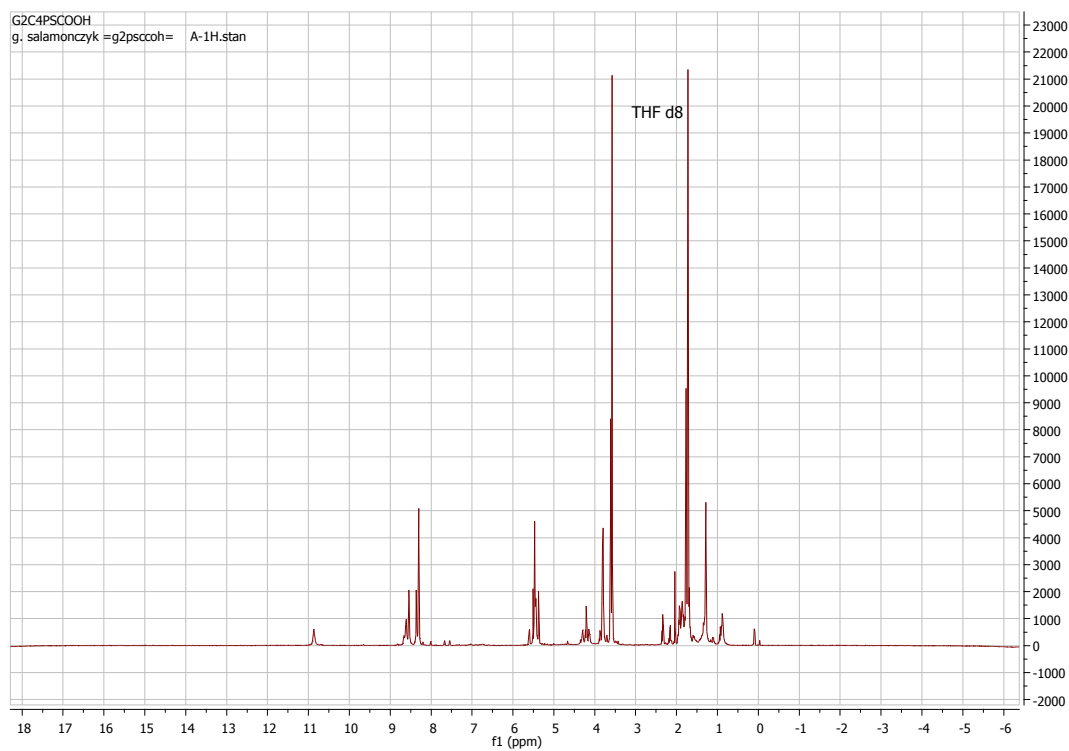

# $^1\text{H} \{^3\text{P}\}$ NMR

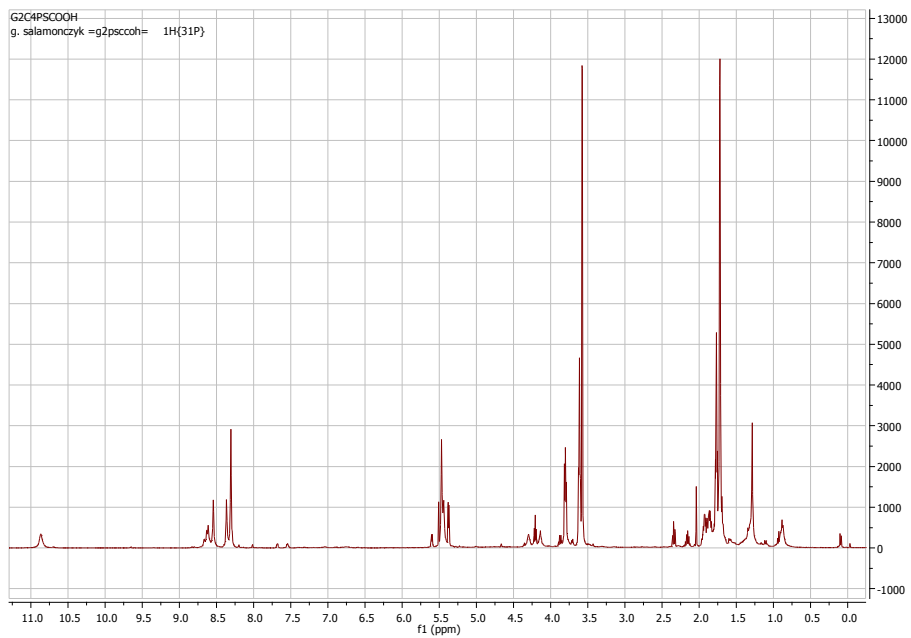

## $^{13}\text{C}$ NMR

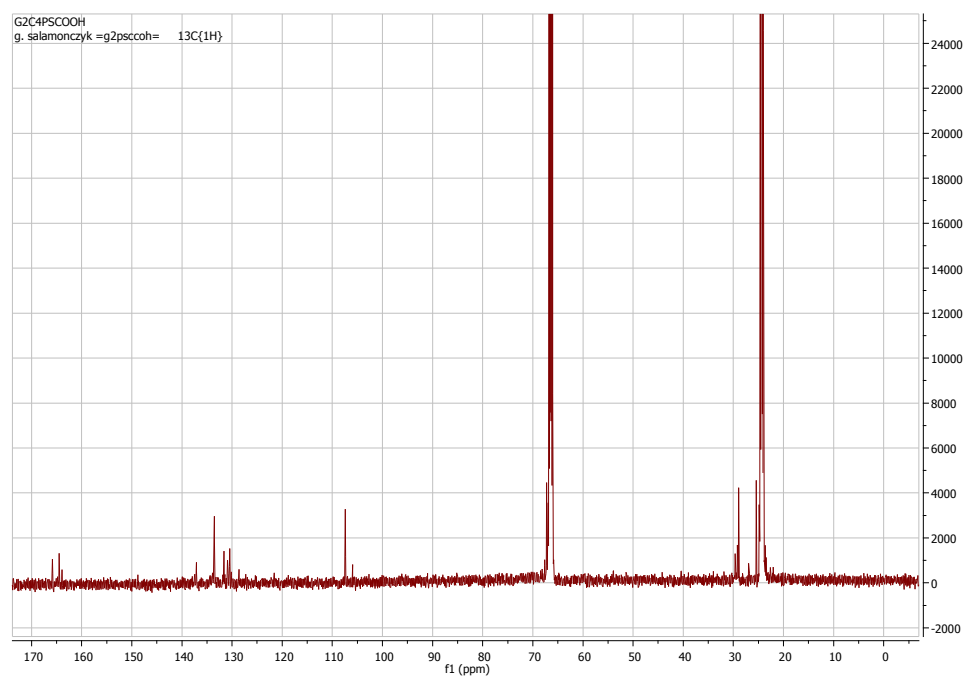

## $^{31}\text{P}$ NMR

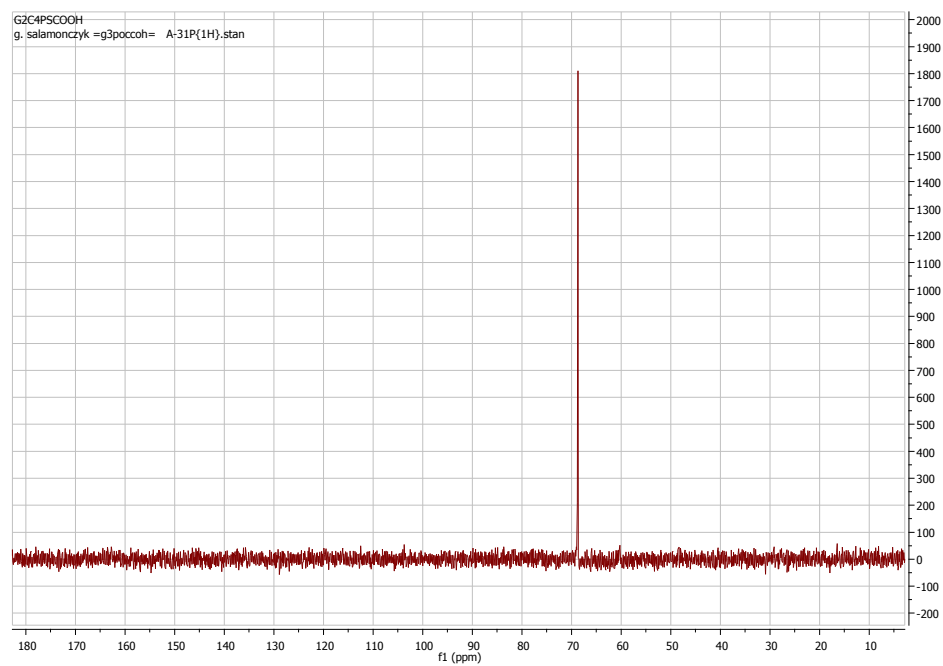

## Spectra of the dendrimer **21**

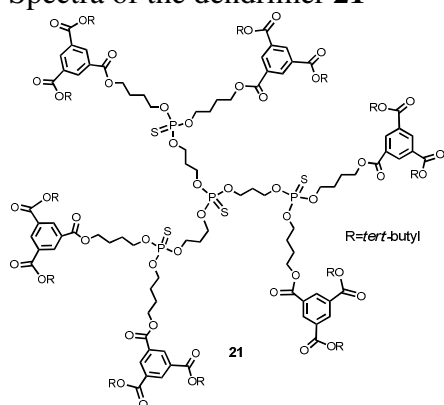

### $^1\text{H}$ NMR

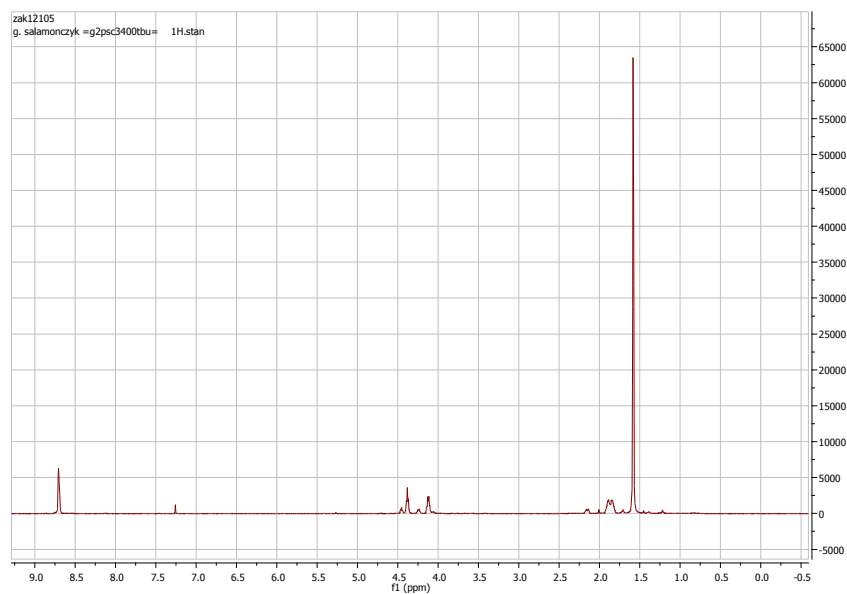

### $^{13}\text{C}$ NMR

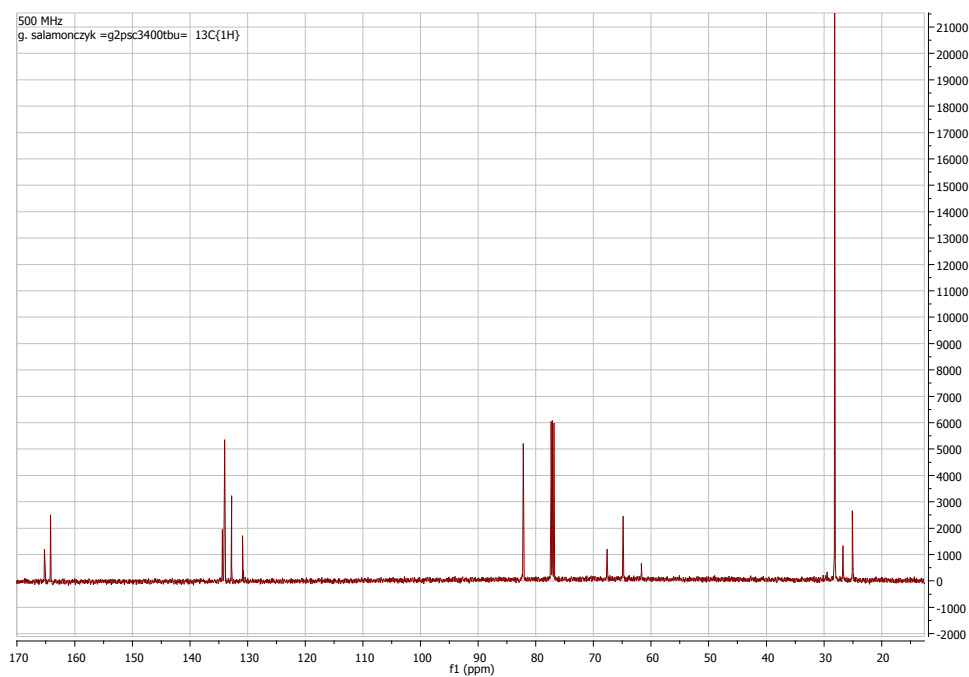

### $^{13}\text{C}$ NMR – DEPT 135

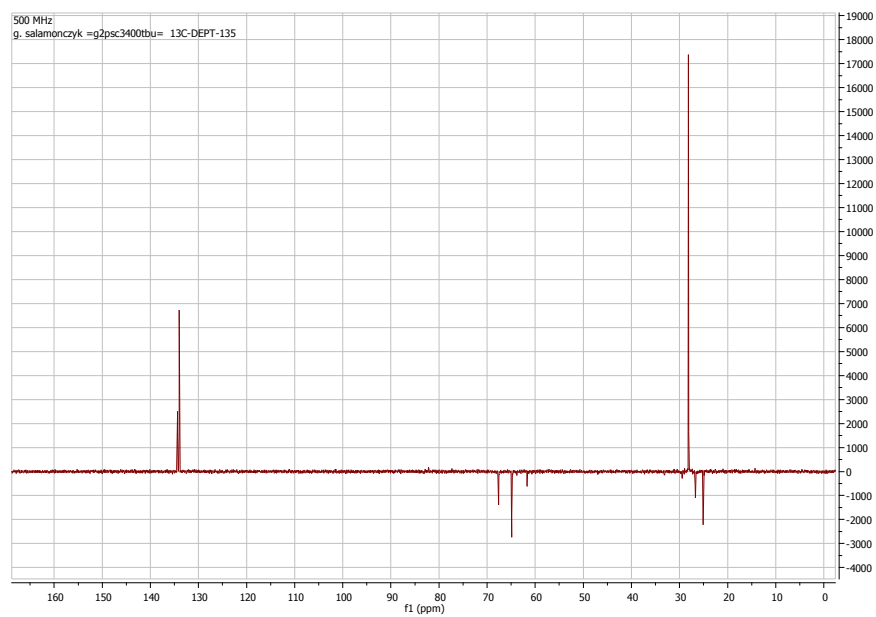

### $^{31}\text{P}$ NMR

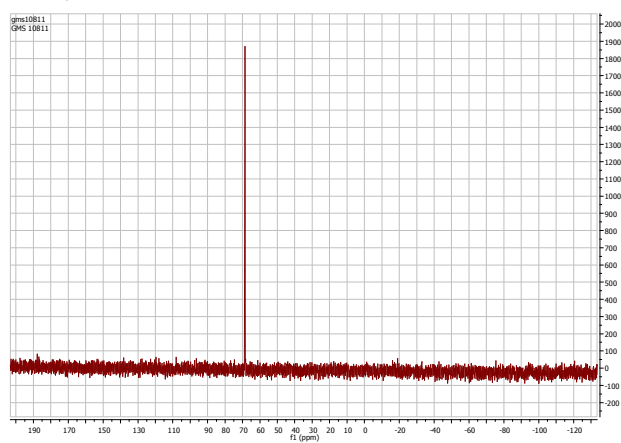

### $^{31}\text{P}$ NMR-expansion

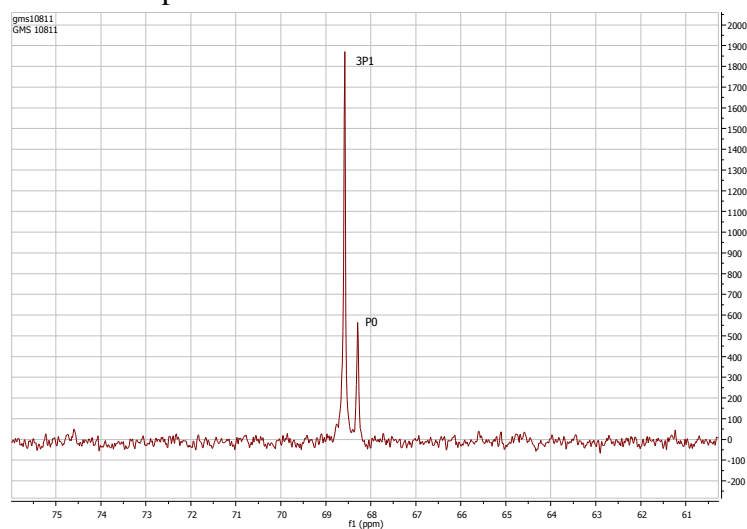



## Spectra of the dendrimer **22** (**23**)

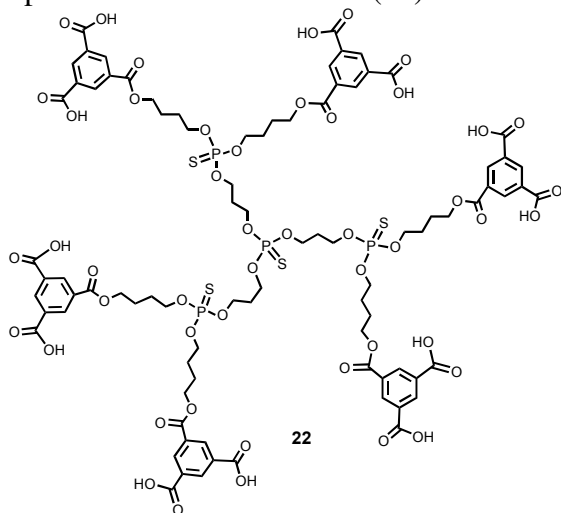

## <sup>1</sup>H NMR

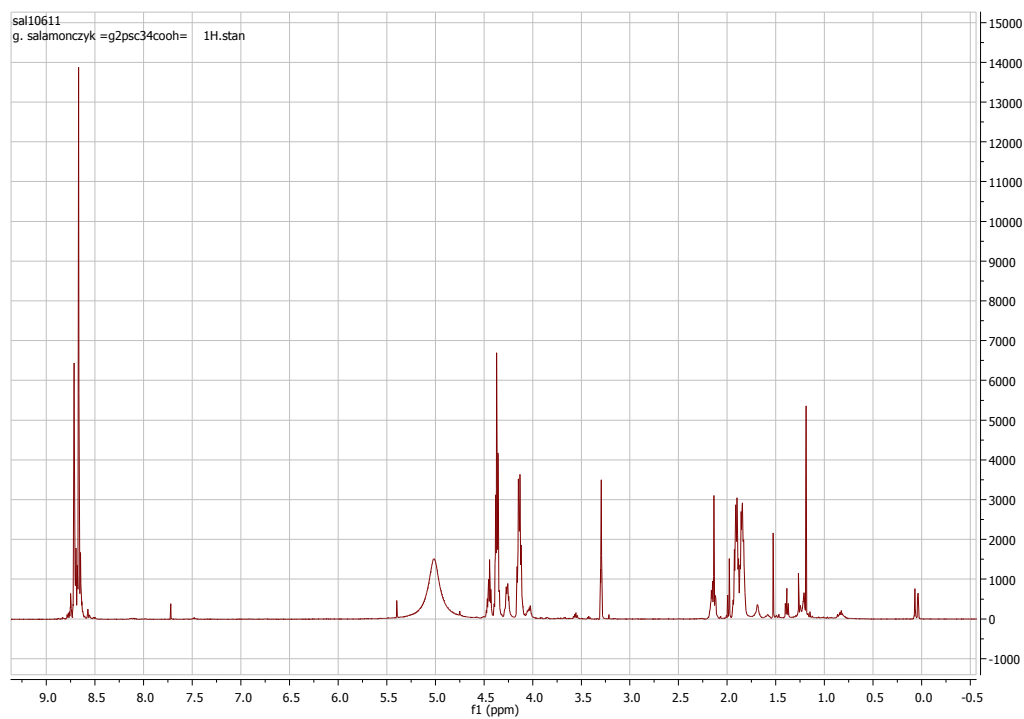

## $^{13}\text{C}$ NMR

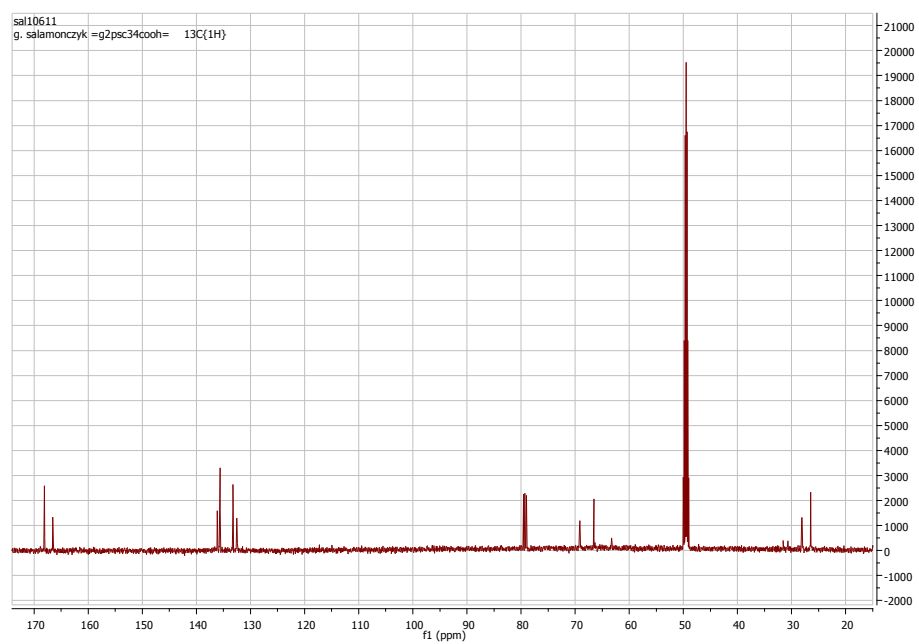

## $^{13}\text{C}$ NMR – DEPT 135

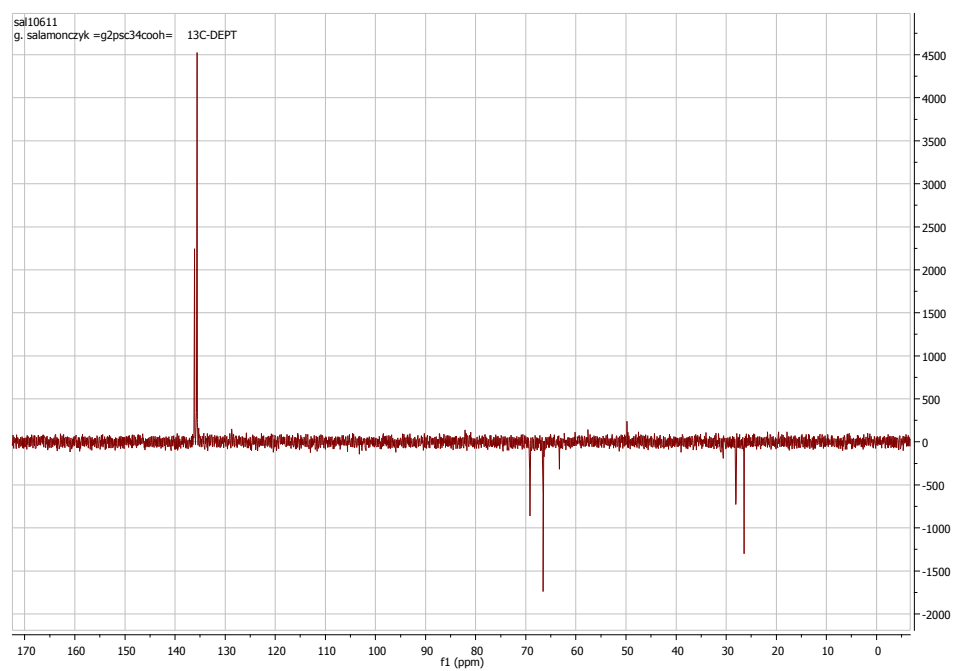

# $^{31}\text{P}$ NMR

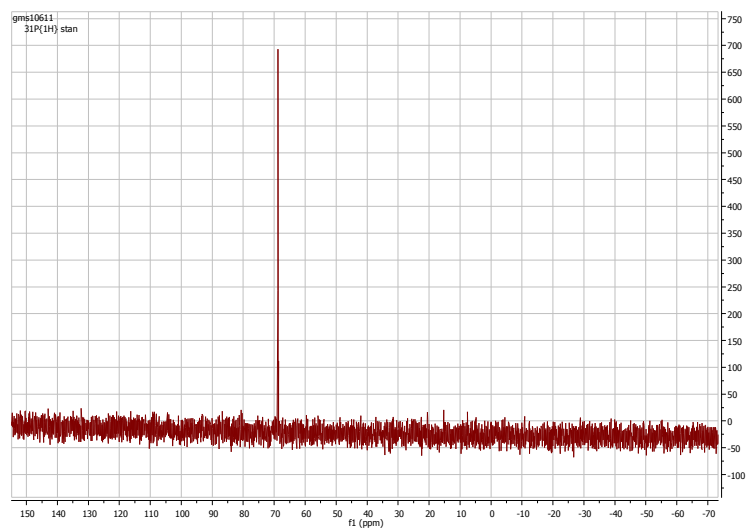

## $^{31}\text{P}$ NMR-expansion

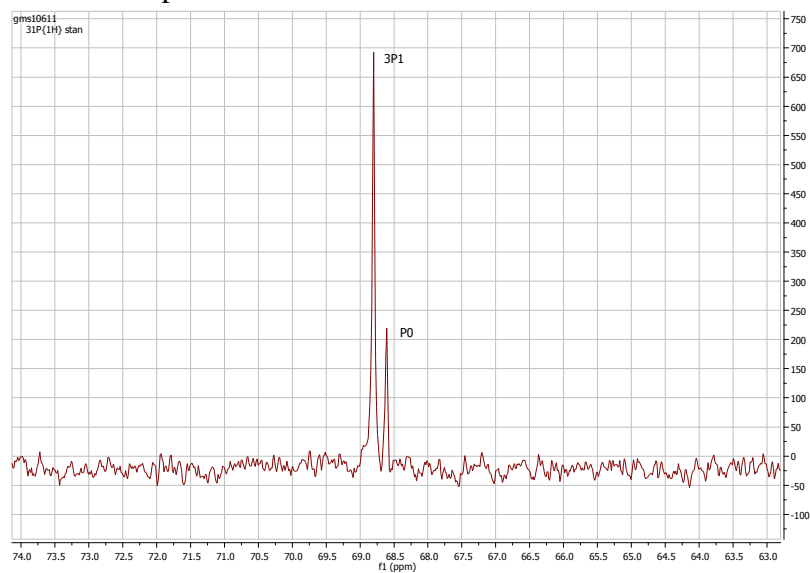

Supplement: s1 [file s1]
